# Supplementary material
Source: PubMed Central journal article supplement (PMC3325728)
Supplement: 1112487109_sapp.pdf [file 1112487109_sapp.pdf]

# Supplementary Information Appendix

A. Crottini, O. Madsen, C. Poux, A. Strauß, D.R. Vieites, M. Vences:

## A vertebrate timetree elucidates the biogeographic pattern of a major biotic change around the K-T boundary in Madagascar

### Extended Methods

Total genomic DNA was extracted using proteinase K (10 mg/ml) digestion followed by a standard salt-extraction protocol (S1) or from ethanol-preserved tissue following the protocol of the Wizard SV Genomic DNA Purification System (Promega) (S2). A combination of degenerated primers was used to amplify overlapping DNA fragments corresponding to 535 aminoacids (AA) of the Recombination Activating Gene 1 (RAG1) gene (AA 467–1001 in human); a fragment of 221 AA of the Brain-derived Neurotrophic Factor (BDNF) gene was amplified using one primer pair, except for the lungfish for which several primer combinations were needed. All primers used are listed in Table S1.

For non-mammalian samples standard Polymerase chain reactions were performed in a final volume of 11  $\mu$ l and using 0.3  $\mu$ l each of 10 pmol primer, 0.25  $\mu$ l of total dNTP 10 mM (Promega), 0.08  $\mu$ l of 5 U/ml GoTaq, and 2.5  $\mu$ l 5 GoTaq Reaction Buffer (Promega). PCR conditions were as follows. BDNF: 94°C for 120 s, followed by 39 cycles of 94°C (20 s), 57°C (45 s), 72°C (120 s), and a final extension phase of 72°C (600 s). RAG1: 94°C (120 s) followed by 45 cycles of 94°C (20 s), 50–53°C (50 s), 72°C (180 s), and a final extension of 72°C (600 s). For mammalian BDNF the PCR reactions were preformed in a final volume of 50  $\mu$ l on 50 to 200 ng of DNA with the Expand DNA system (Roche) using the following program: 120 s at 94 °C; 30 to 35 cycles of 15 s at 94 °C, 60 s at 54–58 °C, and 90 s at 72 °C; and a final step of 120–600 s at 72°C. DMSO (1.3% to 2.5%) and/or Betaine (1 M) was added for some samples. For RAG1 in mammals, the PCR reactions were preformed in a final volume of 40  $\mu$ l on 50 to 200 ng of DNA with the HotStarTaq Plus Master Mix Kit (Qiagen) using the following program: 300 s at 95°C; 40 cycles of 30 s at 94°C, 50 s at 54°C and 90 s at 72°C; and a final step of 600 s at 77°C. Q solution x5 was added for all samples. PCR products were purified from a 1% agarose gel, using GFX PCR DNA & Gel Band Purification Kit (Amersham Biosciences).

PCR products were resolved on automated sequencers (Applied Biosystems: ABI 3130XL or 3730). Newly determined sequences are deposited in Genbank (see Table S2). Chromatographs were checked and sequences were edited and aligned using CodonCode Aligner (v. 3.7.1, Codon Code Corporation). Besides newly determined sequences, some DNA sequences were retrieved from Genbank and in some instances concatenated chimera sequences of different species were compiled from GenBank. For a complete list of taxa, voucher numbers and Genbank accession numbers used in this study see Table S2.

The software Gblocks (S3) was used to delete highly divergent regions that could either not being unambiguously aligned or that were saturated by multiple substitutions. The complete coding region of the BDNF contains (across all vertebrates) three conserved functional motifs (the starting motif, the subtilisin binding site, the glycation and furin site) and one highly conserved Nerve Growth Factor (NGF) domain. The excluded region corresponded to the entire portion of the three functional motifs at the 5' end of the gene. This exclusion was mostly based on difficulties to align Chondrichthyes and Actinopterygii with all the other vertebrates. Additionally all positions with gaps in both genes were excluded from the analyses.

In order to obtain a topology congruent with the most recent phylogenetic hypotheses and reduce computing time, the following constraints were used in the Bayesian phylogenetic analyses: (a) Chiroptera were constrained in basal position to the Carnivora, Cetartiodactyla and Perissodactyla; (b) Daubentoniidae, Lemuridae and Cheirogaleidae were constrained as monophyletic; (c) Nesomyinae were constrained as monophyletic; (d) *Blaesodactylus antongilensis* and *Homopholis walbergii* were constrained as sister species; (e) the Malagasy *Mabuya aureopunctata* and *M. gravenhorstii* were constrained as monophyletic; (f) *Heterixalus tricolor* and *Heterixalus madagascariensis* were constrained as sister species; (g) all amphibians were constrained as monophyletic; (h) Anura and Caudata were constrained as monophyletic with Gymnophiona in basal position.

A Bayes factor analysis (Table S3) was conducted to select the most appropriate partition scheme for Bayesian phylogenetic analysis, and based on the results, we chose the scheme with two partitions (1st plus 2nd positions, and 3rd positions, grouped for both genes).

Convergence and mixing of chains in the Bayesian phylogenetic analyses were assessed by examining output files with the AWTY (Are we There Yet) graphical exploration software (S4). This tool confirmed that (i) split frequencies among runs were strongly correlated, (ii) there was no obvious trend in cumulative split frequencies

of a series of 40 randomly selected splits, (iii) topological differences between trees sampled by independent runs stabilized after ca. 1.5 million generations. Hence, these indicators did not find any indication of poor convergence in our phylogenetic analysis.

Two different approaches were conducted to calculate a timetree from our molecular data:

(i) Bayesian molecular dating (S5) was applied using the Multidivtime program package (S6). This method uses a probabilistic model to quantify changes of substitution rates over time. It relaxes the molecular clock by allowing continuous autocorrelation of substitution rates among the branches of the phylogenetic tree. This approach estimates rates accurately (S7), without requiring the root of the tree to be fixed at a particular date but estimates its age starting from a prior value (split of Chondrichthyes from their sister group, 528 mya). We used default settings of Multidivtime as recommended (S8) except for the following parameters:  $r_{\text{rate}} = 0.000779$ ,  $r_{\text{ratesd}} = 0.000390$ ,  $r_{\text{ttm}} = 528.0$ ,  $r_{\text{ttmsd}} = 100.0$ ,  $r_{\text{bigtime}} = 600.0$ ; except  $r_{\text{rate}}$  and  $r_{\text{ratesd}}$  all in million years. The concatenated sequence data set was partitioned as for the Bayesian phylogenetic analyses (1st plus 2nd positions, and 3rd positions, grouped for both genes) and branch lengths calculated under the F84+gamma model of sequence evolution, which is the most complex model available in Multidivtime. However, different parameter-rich substitution models generally produce branch lengths that are highly correlated (S9). The use of F84 instead of the GTR+I+G model should therefore not significantly alter age estimates. Initially Markov chain Monte Carlo (MCMC) analyses including all 48 time constraints were run four times: twice for ten million generations with a “burn in” of half million generations ('long runs') and twice for 1000000 generations with a “burn in” of 100000 generations ('short runs') with chains sampled every 100 generations in all analyses. The difference in calculated node age, mutual and between long and short runs, were less than 1% for all nodes, leading us to apply 'short runs' in all subsequent analyses. We performed multiple independent runs as cross-validation of age constraints (see Results) and calculated the final timetree after exclusion of C15, C16, C19, C27, and C29, again with several independent runs of one million generations plus one run with ten million generations, and with less than 1% differences among all nodes except one (with a max. difference of 3.8%).

(ii) Additionally, reconstruction of phylogenetic relationships and molecular dating were also conducted by BEAST v1.6.0 (S10). The 50% majority-rule consensus tree obtained with MrBayes and rendered ultrametric using Multidivtime, was used as a starting tree for independent BEAST runs and a lognormal uncorrelated relaxed clock model was specified. We included two speciation process models: birth–death (S11) and pure birth (S12) as they were shown to yield different age estimates (S11). We ran analyses either fixing the topology of the starting tree or letting BEAST searching for the best tree (still constraining the monophyly of the nodes under interest). The Bayes factor as implemented in Tracer 1.5 (a part of the BEAST package) was used to select the best-fitting model under the smoothed marginal likelihood estimate and with 1000 bootstrap replicates (S13). Four different analyses with 8 independent runs of 10 million generations each were undertaken by sampling every 10000th generations. Tracer 1.5 was used to check for convergence of the model likelihood and parameters between each run until reaching stationarity. Results were considered reliable once the effective sampling size (ESSs) of all parameters was above 100. The resulting log and tree files were then combined using LogCombiner. In order to check whether our data were informative, we ran analyses sampling only from the priors distribution.

To understand whether clade age influences clade species richness we transformed (S14) data of species richness and body size (snout-vent length, SVL) to fit requirements of linear analysis. A linear model (ANCOVA) was performed on species richness as dependent and a series of factors that might influence species richness as independent variables: clade age, rainforest occurrence, body size, endothermy, trophic position, internal vs. external fertilization, parental care, and aquatic vs. terrestrial habitat. Factors were deleted sequentially from the full model based on the Akaike Information Criterion, AIC (S15) until the minimum adequate model was reached. Due to restricted sample size, interactions were not included in the full model. Analyses were performed in R 2.9.2 (S16) including the package car (S17).

## Extended and Additional Results

Cross-validation of time constraints indicated only three of our initial 48 constraints as somewhat incongruent with the remaining set of calibrations (Table S5): C19 - the colonization of the younger volcanic islands by lizards (*Gallotia*) at <14 mya; C29 - the origin of primates at 66–56 mya; and C27 - the split of panungulates at 65–54 mya. For the two mammal constraints (primates and panungulates), our data indicated substantially older ages than suggested by fossil estimates. For primates, this agrees with recent publications (S18, S19) that place the origin of crown primates at about 87 mya. Similarly, the panungulate constraint has been criticized as possibly being too young (S20) and reconstructed to be at 78 mya (S21). Therefore, the paleontological

constraints typically used for the most recent common ancestor (MRCA) of primates and for the MRCA of paenungulates appear to represent underestimates of the actual divergence times of these groups. This suggests that the earliest fossils found up to now are far from representing the earliest paenungulate and primate and that older fossils belonging to these groups remain to be found, and supports our decision to exclude these constraints. Calibrations C15 and C16 (split of acrodont iguanians and split of iguanians based on the fossil *Bharatagama*) were excluded because of doubts on fossil identity, after ascertaining that their inclusion (which results in somewhat older ages of most squamate nodes) does not alter the statistical significance of the influence of clade age on species richness.

One conspicuous pattern in the data set is the presence of very long branches at the basis of some species-poor and old Malagasy clades. In 20 clades for which stem and crown ages are represented in our data set, we subtracted crown from stem age to obtain the stem-crown age gap in cladogenesis, here abbreviated SCG. The obtained SCG values are significantly correlated with stem age (but not with species numbers) in the two analyses (ACR:  $R=0.652$ ;  $P=0.0018$ ; ICR:  $R=0.665$ ,  $P=0.0014$ ). This may indicate that the programs stretch basal branches to become artificially longer in old clades. To correct for such a possible influence of oversmoothing, we calculated a relative SCG, dividing SCG by stem age. These relative SCG values were significantly negatively correlated with species richness (non-parametric correlations; ACR: Spearman's  $R=-0.639$ ,  $P=0.0024$ ; ICR:  $R=-0.660$ ,  $P=0.0015$ ) (Fig. S3) but not with clade age, suggesting that groups in which diversification started soon after colonization are the most species rich ones.

## Supplementary Information references

- S1 Bruford MW, Hanotte O, Brookfield JFY, Burke T (1992) in *Molecular Genetic Analysis of Populations: A Practical Approach*, ed Hoelzel AR (IRL Press, Oxford), pp. 225–270.
- S2 Poux C, et al. (2005) Asynchronous colonization of Madagascar by the four endemic clades of primates, tenrecs, carnivores, and rodents as inferred from nuclear genes. *Syst Biol* 54:719–730.
- S3 Castresana J (2000) Selection of conserved blocks from multiple alignments for their use in phylogenetic analysis. *Mol Biol Evol* 17:540–552.
- S4 Nylander JAA, Wilgenbusch JC, Warren DL, Swofford DL (2008) AWTY (are we there yet?): a system for graphical exploration of MCMC convergence in Bayesian phylogenetics. *Bioinformatics* 4:581–583.
- S5 Thorne JL, Kishino H, Painter IS (1998) Estimating the rate of evolution of the rate of molecular evolution. *Mol Biol Evol* 15:1647–1657.
- S6 Thorne JL, Kishino HK (2002) Divergence time and evolutionary rate estimation with multilocus data. *Syst Biol* 51:689–702.
- S7 Ho SYW, Phillips MJ, Drummond AJ, Cooper A (2005) Accuracy of rate estimation using relaxed clock models, with a critical focus on the early metazoan radiation. *Mol Biol Evol* 22:1355–1363.
- S8 Rutschmann F (2005) *Bayesian Molecular Dating Using PAML/MULTIDIVTIME: A Step-by-Step Manual, version 1.5 (July 2005)*. University of Zurich, Zurich, Switzerland.
- S9 Böhning-Gaese K, Caprano T, van Ewijk K, Veith M (2006) Range size: disentangling current traits, phylogenetic, and biogeographic factors. *Am Nat* 167:555–567.
- S10 Drummond AJ, Rambaut A (2007) BEAST: Bayesian evolutionary analysis by sampling trees. *BMC Evol Biol* 7: article 214
- S11 Gernhard T (2008) The conditioned reconstructed process. *J Theor Biol* 253:769–778.
- S12 Yule GU (1924) A mathematical theory of evolution based on the conclusions of Dr J. C. Willis. *Phil Trans R Soc Lond B* 213:21–87.
- S13 Suchard MA, Weiss RE, Sinsheimer JS (2001) Bayesian selection of continuous-time Markov chain evolutionary models. *Mol Biol Evol* 18:1001–1013.
- S14 Box GEP, Cox DR (1964) An analysis of transformations. *J Roy Stat Soc Ser B* 26:211–252.
- S15 Burnham KB, Anderson DR (1998) *Model Selection and Inference. A Practical Information-Theoretic Approach*. Springer Verlag, Heidelberg.
- S16 R Development Core Team (2009) *R: A language and environment for statistical computing. R Foundation for Statistical Computing*, Vienna, Austria. ISBN 3-900051-07-0, URL <http://www.R-project.org>.
- S17 Fox J (2009) *car: companion to applied regression. R package version 1.2-16*. <http://CRAN.R-project.org/package=car>
- S18 Wilkinson RD, Steiper ME, Soligo C, Martin RD, Yang Z, Tavaré S (2011) Dating primate divergences through an integrated analysis of palaeontological and molecular data. *Sys Bio* 60:16–31.
- S19 Perelman P, Johnson WE, Roos C, Seuánez HN, Horvath JE, et al. (2011) A molecular phylogeny of living primates. *PLoS Genet* 7:e1001342. doi:10.1371/journal.pgen.1001342
- S20 Delsuc F, Vizcaíno SF, Douzery EJP (2004) Influence of Tertiary paleoenvironmental changes on the diversification of South American mammals: a relaxed molecular clock study within xenarthrans. *BMC Evol Biol* 4:11.
- S21 Bininda-Emonds ORP, Cardillo M, Jones KE, MacPhee RDE, Beck RMD, Grenyer R, Price SA, Vos RA, Gittleman JL, Purvis A (2007) The delayed rise of present-day mammals. *Nature* 446:507–512.

- S22 Yoder AD, Nowak M (2006) Has vicariance or dispersal been the predominant biogeographic force in Madagascar?: Only time will tell. *Ann Rev Ecol Evol Syst* 37:405–431.
- S23 Vieites DR, Mi-Sook M, Wake DB (2007) Rapid diversification and dispersal during periods of global warming by plethodontid salamanders. *Proc Nat Acad Sci USA* 104:19903–19907.
- S24 Hoegg S, Vences M, Brinkmann H, Meyer A (2004) Phylogeny and comparative substitution rates of frogs inferred from sequences of three nuclear genes. *Mol Biol Evol* 21:1188–1200.
- S25 Vences M, Freyhof J, Sonnenberg R, Kosuch J, Veith M (2001) Reconciling fossils and molecules: Cenozoic divergence of cichlid fishes and the biogeography of Madagascar. *J Biogeogr* 28:1091–1099.
- S26 Murray AM (2001) The fossil record and biogeography of the Cichlidae (Actinopterygii: Labroidae). *Biol J Lin Soc* 74:517–532.
- S27 Azuma Y, Kumazawa Y, Miya M, Mabuchi K, Nishida M (2008) Mitogenomic evaluation of the historical biogeography of cichlids toward reliable dating of teleostean divergences. *BMC Evol Biol* 8:215.
- S28 San Mauro D, Vences M, Alcobendas M, Zardoya R, Meyer A (2005) Initial diversification of living amphibians predated the breakup of Pangaea. *Am Nat* 165:590–599.
- S29 Krijgsman W, Hilgen FJ, Raffi I, Sierro FJ, Wilson DS (1999) Chronology, causes and progression of the Messinian salinity crisis. *Nature* 400:652–655.
- S30 Warren BH, et al. (2003) Molecular phylogeography reveals island colonization history and diversification of western Indian Ocean sunbirds (Nectarinia: Nectariniidae). *Mol Phylogenet Evol* 29:67–85.
- S31 Evans SE, Milner AR, Mussett F (1990) A discoglossid frog (Amphibia: Anura) from the Middle Jurassic of England. *Palaeontology* 33:299–311.
- S32 Müller J, Reisz RR (2005) Four well-constrained calibration points from the vertebrate fossil record for molecular clock estimates. *BioEssays* 27:1069–1075.
- S33 Hirayama (1998) Oldest known sea turtle. *Nature* 392:705–708.
- S34 Noonan B, Chippindale P (2006) Vicariant origin of Malagasy reptiles supports Late Cretaceous Antarctic land bridge. *Am Nat* 168:730–741.
- S35 Li Chun, et al. (2008). An ancestral turtle from the Late Triassic of southwestern China. *Nature* 456:497–501.
- S36 Bischoff, W. (Ed.): *Handbuch der Reptilien und Amphibien Europas. Bd. 6 Die Reptilien der Kanarischen Inseln, der Selvagens-Inseln und des Madeira Archipels [Handbook of the Amphibians and Reptiles of Europe. Volume 6. The Reptiles of the Canary Islands, the Selvagens Islands, and the Madeira Archipelago]*. Wiesbaden, Germany (Aula-Verlag), 387–407. German
- S37 Hipsley CA, Himmelman L, Metzler D, Müller J (2009) Integration of Bayesian molecular clock methods and fossil-based soft bounds reveals early Cenozoic origin of African lacertid lizards. *BMC Evol Biol* 9:151.
- S38 Hirsch KF (1996) Parataxonomic classification of fossil chelonian and Gecko eggs. *J Vert Paleont* 16:752–762.
- S39 Benton MJ, Donoghue PCJ, Asher RJ (2009) in *The Time Tree of Life*, eds Hedges SB, Kumar S (Oxford University Press, Oxford), pp. 35–86.
- S40 Benton MJ, Donoghue PCJ (2007) Paleontological evidence to date the Tree of Life. *Mol Biol Evol* 24:26–53.
- S41 Graur D, Martin W (2004) Reading the entrails of chickens: molecular timescales of evolution and the illusion of precision. *Trends Gen* 20:80–86.
- S42 Van der Meijden A, et al. (2007) Nuclear gene phylogeny of narrow-mouthed toads (Family: Microhylidae) and a discussion of competing hypotheses concerning their biogeographical origins. *Mol Phylogenet Evol* 44:1017–1030.
- S43 Vences M, et al. (2003) Multiple overseas dispersal in amphibians. *Proc R Soc London B* 1532:2435–2442.
- S44 Vidal N, et al. (2010) Blindsnake evolutionary tree reveals long history on Gondwana. *Biol Lett* 6:558–561.
- S45 Nagy ZT, Joger U, Wink M, Glaw F, Vences M (2003) Multiple colonization of Madagascar and Socotra by colubrid snakes: evidence from nuclear and mitochondrial gene phylogenies. *Proc R Soc London Ser B* 270:2613–2621.
- S46 Townsend TM, Tolley KA, Glaw F, Böhme W, Vences M (2010) Eastward from Africa: palaeocurrent-mediated chameleon dispersal to the Seychelles islands. *Biol Lett* 7:225–228.
- S47 Poux C, Madsen O, Glos J, de Jong WW, Vences M (2008) Molecular phylogeny and divergence times of Malagasy tenrecs: influence of data partitioning and taxon sampling on dating analyses. *BMC Evol Biol* 8:102.
- S48 Vieites DR, et al. (2009) Vast underestimation of Madagascar's biodiversity evidenced by an integrative amphibian inventory. *Proc Natl Acad Sci USA* 106:8267–8272.
- S49 Sparks JS, Smith WL (2004) Phylogeny and biogeography of the Malagasy and Australasian rainbowfishes (Teleostei: Melanotaeniidae): Gondwanan vicariance and evolution in freshwater. *Mol Phylogenet Evol* 33:719–734.
- S50 Murphy WJ, Collier GE (1997) A molecular phylogeny for aplocheiloid fishes (Atherinomorpha, Cyprinodontiformes): the role of vicariance and the origins of annualism. *Mol Biol Evol* 14:790–799.
- S51 Azuma Y, Kumazawa Y, Miya M, Mabuchi K, Nishida M (2008) Mitogenomic evaluation of the historical biogeography of cichlids toward reliable dating of teleostean divergences. *BMC Evol Biol* 8:215.
- S52 Farias IP, Ortí G, Meyer A (2000) Total evidence: molecules, morphology, and the phylogeny of cichlid fishes. *J Exp Zool* 288:76–92.
- S53 Van Bocxlaer I, Roelants K, Biju SD, Nagaraju J, Bossuyt F (2006) Late Cretaceous vicariance in Gondwanan Amphibians. *PLoS One* 1:e74.

- S54 Bossuyt F, Brown RM, Hillis DM, Cannatella DC, Milinkovitch MC (2006) Phylogeny and biogeography of a cosmopolitan frog radiation: Late Cretaceous diversification resulted in continent-scale endemism in the family Ranidae. *Syst Biol* 55:579–594.
- S55 Wollenberg KC, Glaw F, Meyer A, Vences M (2007) Molecular phylogeny of Malagasy reed frogs, *Heterixalus*, and the relative performance of bioacoustics and color-patterns for resolving their systematics. *Mol Phylogenet Evol* 45:14–22.
- S56 Vences M, Kosuch J, Glaw F, Böhme W, Veith M (2003) Molecular phylogeny of hyperoliid treefrogs: biogeographic origin of Malagasy and Seychellean taxa and re-analysis of familial paraphyly. *J Zool Syst Evol Res* 41:205–215.
- S57 Measey GJ, Vences M, Drewes RC, Chiari Y, Melo M, Bourles B (2007) Freshwater paths across the ocean: molecular phylogeny of the frog *Ptychadena newtoni* gives insights into amphibian colonization of oceanic islands. *J Biogeogr* 34:7–20.
- S58 Vences M, Kosuch J, Rödel MO, Lötters S, Channing A, Glaw F, Böhme W (2004) Phylogeography of *Ptychadena mascareniensis* suggests transoceanic dispersal in a widespread African-Malagasy frog lineage. *J Biogeogr* 31:593–601.
- S59 Vargas-Ramírez M, Castaño-Mora OV, Fritz U (2008) Molecular phylogeny and divergence times of ancient South American and Malagasy river turtles (Testudines: Pleurodira: Podocnemididae). *Org Divers Evol* 8:388–398.
- S60 Le M, Raworthy CJ, McCord WP, Mertz L (2006) A molecular phylogeny of tortoises (Testudines: Testudinidae) based on mitochondrial and nuclear genes. *Mol Phylogenet Evol* 40:517–531.
- S61 Palkovacs EP, Gerlach J, Caccone A (2002) The evolutionary origin of Indian Ocean tortoises (*Dipsoschelys*). *Mol Phylogenet Evol* 24:216–227.
- S62 Hekkala ER, Amato G, DeSalle R, Blum MJ (2010) Molecular assessment of population differentiation and individual assignment potential of Nile crocodile (*Crocodylus niloticus*) populations. *Cons Genet* 11:1435–1443.
- S63 Noonan BP, Chippindale PT (2006) Dispersal and vicariance: The complex evolutionary history of boid snakes. *Mol Phylogenet Evol* 40:347–358.
- S64 Kelly CMR, Barker NP, Villet MH, Broadley DG (2009) Phylogeny, biogeography and classification of the snake superfamily Elapoidea: a rapid radiation in the late Eocene. *Cladistics* 25:38–63.
- S65 Raxworthy CJ, Forstner MRJ, Nussbaum RA (2002) Chameleon radiation by oceanic dispersal. *Nature* 415:784–787.
- S66 Lamb T, Meeker AM, Bauer AM, Branch WR (2003) On the systematic status of the desert plated lizard (*Angolosaurus skoogi*): phylogenetic inference from DNA sequence analysis of the African Gerrhosauridae. *Biol J Linn Soc* 78:253–261
- S67 Raselimanana AP, Noonan B, Karanth KP, Gauthier J, Yoder AD (2009) Phylogeny and evolution of Malagasy plated lizards. *Mol Phylogenet Evol* 50:336–344.
- S68 Honda M, Ota H, Köhler G, Ineich I, Chirio L, Chen SL, Hikida T (2003) Phylogeny of the lizard subfamily Lygosominae (Reptilia: Scincidae), with special reference to the origin of the new world taxa. *Genes Genet Syst* 78:71–80.
- S69 Crottini A, Dordel J, Köhler J, Glaw F, Schmitz A, Vences M (2009) A multilocus phylogeny of Malagasy scincid lizards elucidates the relationships of the fossorial genera *Androngo* and *Cryptoscincus*. *Mol Phylogenet Evol* 53:345–350.
- S70 Rocha S, Vences M, Glaw F, Posada D, Harris DJ (2009) Multigene phylogeny of Malagasy day geckos of the genus *Phelsuma*. *Mol Phylogenet Evol* 52:530–537.
- S71 Gamble T, Bauer AM, Colli GR, Greenbaum E, Jackman TR, Vitt LJ, Simons AM (2011) Coming to America: multiple origins of New World geckos. *J Evol Biol* 24:231–244.
- S72 Röhl B, Pröhl H, Hoffmann KP (2010) Multigene phylogenetic analysis of *Lygodactylus* dwarf geckos (Squamata: Gekkonidae). *Mol Phylogenet Evol* 56:327–335.
- S73 Greenbaum E, Bauer AM, Jackman TR (2007) *Homopholis* and *Blaesodactylus* (Squamata: Gekkonidae) revisited: new insights from a molecular phylogeny. *Afr J Herpetol* 56:101–114.
- S74 Jackman TR, Bauer AM, Greenbaum E, Glaw F, Vences M (2008) Molecular phylogenetic relationships among species of the Malagasy-Comoran gecko genus *Paroedura* (Squamata: Gekkonidae). *Mol Phylogenet Evol* 46:74–81.
- S75 Greenbaum E, Bauer AM, Jackman TR, Vences M, Glaw F (2007) A phylogeny of the enigmatic Madagascan geckos of the genus *Uroplatus* (Squamata: Gekkonidae). *Zootaxa* 1493:41–51.
- S76 Vences M, Wanke S, Vieites DR, Branch WR, Glaw F, Meyer A (2004) Natural colonization or introduction? Phylogeographical relationships and morphological differentiation of house geckos (*Hemidactylus*) from Madagascar. *Biol J Linn Soc* 83:115–130.
- S77 Boumans L, Vieites DR, Glaw F, Vences M (2007) Geographical patterns of deep mitochondrial differentiation in widespread Malagasy reptiles. *Mol Phylogenet Evol* 45:822–839.
- S78 Yoder AD, Burns MM, Zehr S, Delefosse T, Veron G, Goodman SM, Flynn JJ (2003) Single origin of Malagasy Carnivora from an African ancestor. *Nature* 421:734–737.
- S79 Jansa SA, Goodman SM, Tucker PK (1999) Molecular phylogeny and biogeography of the native rodents of Madagascar (Muridae: Nesomyinae): A test of the single-origin hypothesis. *Cladistics* 15:253–270.
- S80 Glaw F, Vences M (2007) *A Field Guide to the Amphibians and Reptiles of Madagascar. Third Ed.* Cologne, Germany.

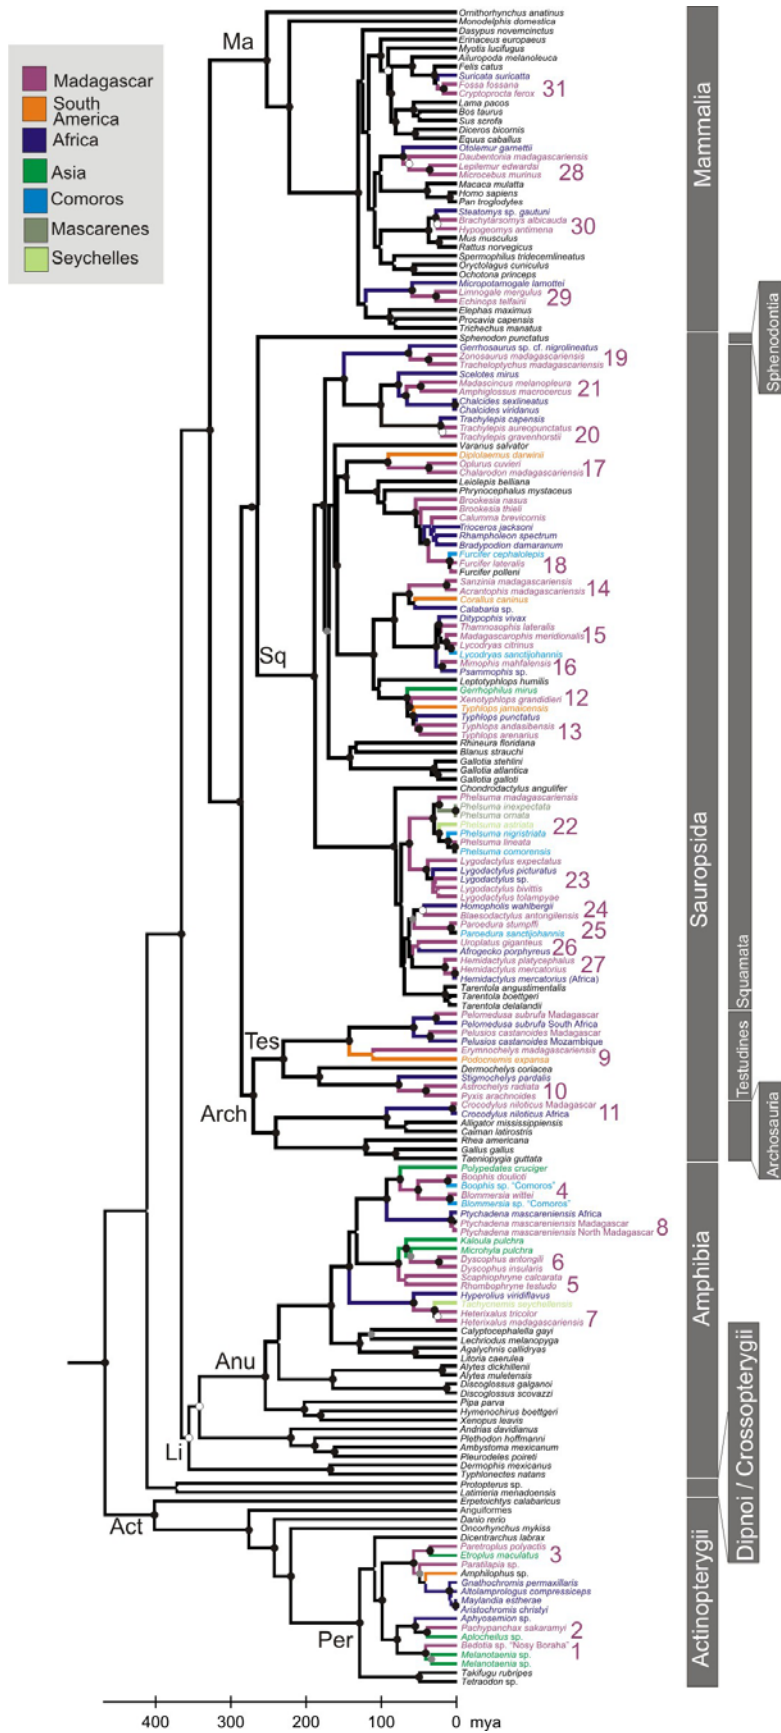

**Figure S1.** Vertebrate timetree calculated based on a 50% majority rule consensus tree from a Bayesian analysis of 1747 bp DNA sequences of the RAG1 and BDNF genes (as in Fig. 1, showing names of all taxa included). Black dots at nodes indicate Bayesian support >0.98, grey dots 0.95–0.98, and white dotted nodes were constrained before the analysis. Numbers denote clades as listed in Table 1 and Table S6.

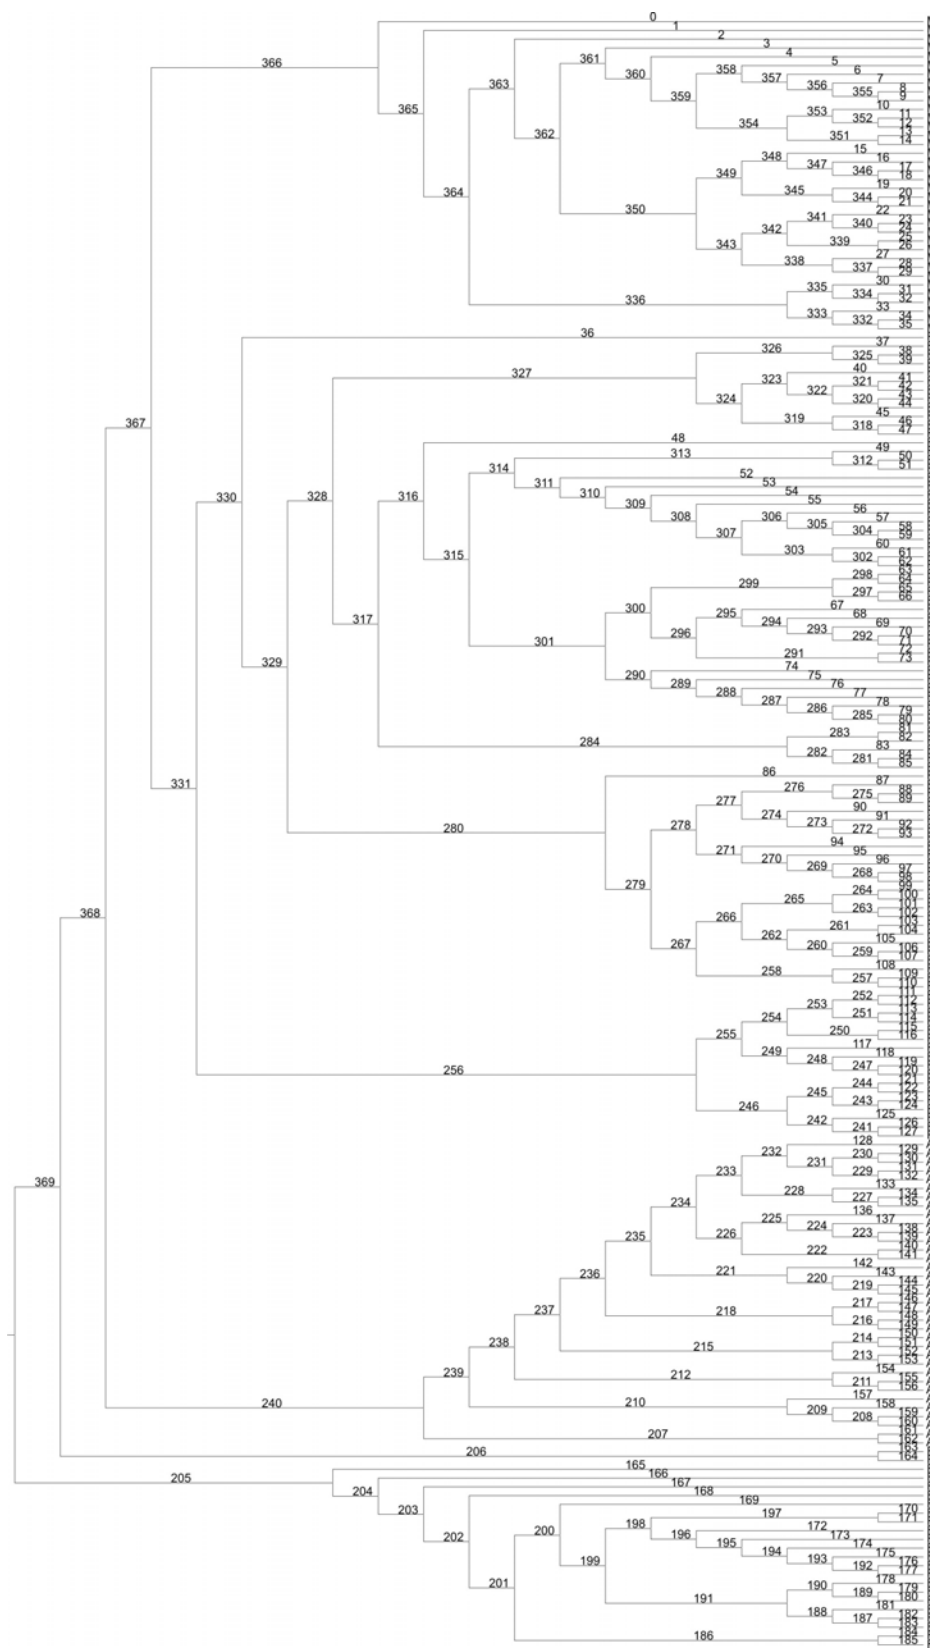

**Figure S2.** Ultrametric tree obtained by ACR analysis (using Multidivtime), showing node numbers (compare with Table S4 for placement of age constraints).

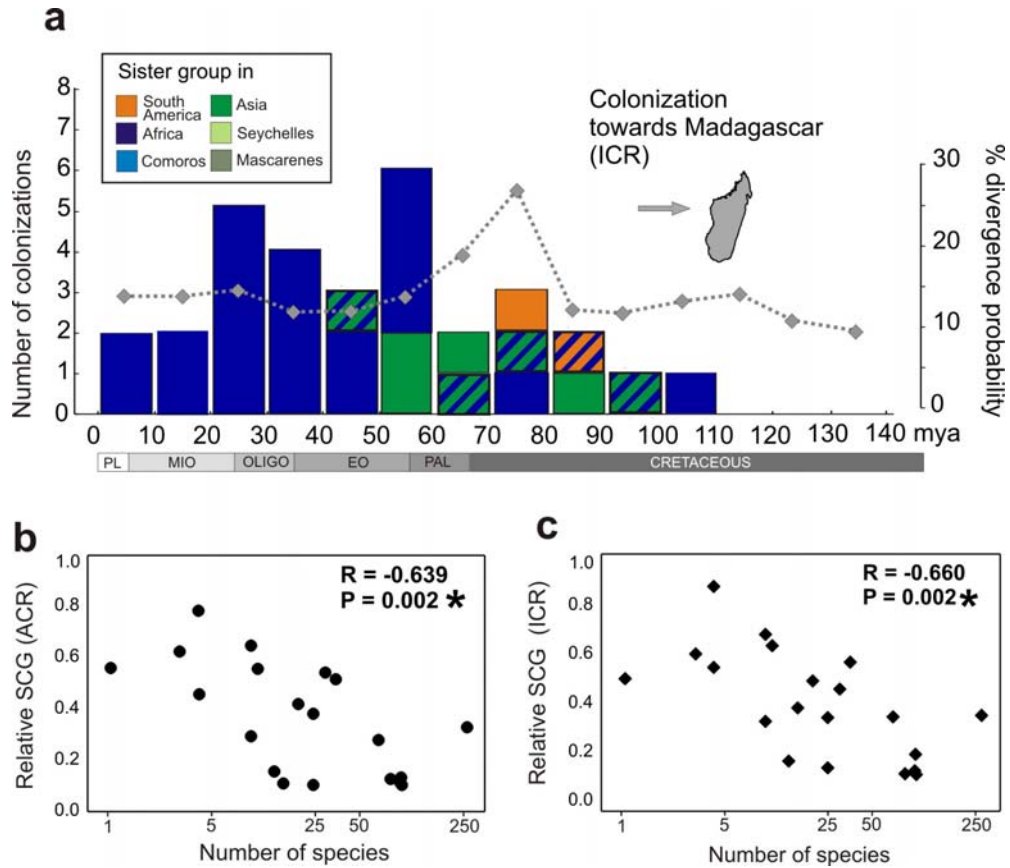

**Figure S3.** (a) Histogram of ICR stem divergence age distribution of Malagasy vertebrate clades, derived from the timetree in Fig. 1 of the main paper, color-coded depending on the distribution of their sister group. Rhomboids connected by dotted line in upper figure show the probability of clade origins derived from a model assuming 80% dispersal and 20% vicariance (S22). (b/c) Scatterplots of species richness of endemic Madagascar clades vs. relative SCG values (stem minus crown age, divided by stem age for correction of oversmoothing), separately for ACR and ICR analyses. Test statistics refer to Spearman's R in non-parametric correlations, asterisks indicate significance.

**Table S1.** Primers used to amplify and sequence the fragments of the RAG1 and BDNF genes used in this study.

| Gene | Primer name  | Sequence (5' - 3')           | Source |
|------|--------------|------------------------------|--------|
| BDNF | BDNF_DRV_F1  | ACCATCCTTTTCCTKACTATGG       | S23    |
| BDNF | BDNF_DRV_R1  | CTATCTTCCCCTTTTAATGGTC       | S23    |
| BDNF | BDNF_DRV_F2  | ACTATGGTTATTTTCATAC          | New    |
| BDNF | BDNF_DRV_R3  | GTGCATACACACGAAGTGTC         | New    |
| BDNF | BDNF_30      | GTCAAGTGCCTTTGGAG            | New    |
| BDNF | BDNF_50      | GACATGTCCACKGCAGTC           | New    |
| RAG1 | Amp_F1       | ACAGGATATGATGARAAGCTTGT      | S24    |
| RAG1 | Amp_R1       | AACTACGCTGCATTKCCAATRTCACA   | S24    |
| RAG1 | Amp_R2       | GGTGYTTYAACACATCTTCCATYTCRTA | S24    |
| RAG1 | Mart_R6      | GTGTAGAGCCARTGRTGYTT         | S24    |
| RAG1 | RAG1_DRV_UCF | GGGMGGCAGATCTTYCAGCC         | New    |
| RAG1 | RAG1_DRV_UCR | TTGGACTGCCTGGCATTTCAT        | New    |
| RAG1 | Mart_FL1     | AGCTGGAGYCARTAYCAYAARATG     | S24    |
| RAG1 | Amp_F2       | ACNGGNMGICARATCTTYCARCC      | S24    |



|      |                |                          |                |
|------|----------------|--------------------------|----------------|
| RAG1 | RAG1_DRV_LygoF | ATAACAGGAAGGCAGATTTTCCAG | New            |
| RAG1 | RAG1_DRV_LygoR | CTTGGACTGCCTGGCATTTCAT   | New            |
| RAG1 | RAG1_FOR1      | CARTAYCAYAAGATGTACMGGAC  | New            |
| RAG1 | RAG1_FOR2      | CAYAAGATGTACMGGACNGT     | New            |
| RAG1 | RAG1_REV1      | GACTGYCTGGCRTTCATYTTBCG  | New            |
| RAG1 | RAG1_REV2      | TTGGACTGCCTGGCRTTCAT     | New            |
| RAG1 | RAG1_REV3      | TRTGRGYRTTCATAAACYTYTG   | New            |
| RAG1 | RAG1_51        | GCNGARAGRGARGCYATGAA     | New            |
| RAG1 | RAG1_31        | TAGCCYCCCAKCTCNAG        | New            |
| RAG1 | RAG1ForB       | AACTGTGYTGCAAGCCVYTG     | New (Internal) |
| RAG1 | RAG1ForC       | CTCCGVAARAAGATGAAYCTVAA  | New (Internal) |
| RAG1 | RAG1RevB       | ACAGTCTCYTKGGTCATNAGC    | New (Internal) |
| RAG1 | RAG1RevC       | ATGCCTCCCAKCTCMAGC       | New (Internal) |

**Table S2.** Species included in this study and Genbank accession numbers of the respective RAG1 and BDNF sequences. Taxa are listed according to their appearance in the tree. For species belonging to an endemic Malagasy clade, the clade number (as in Table 1 of main paper) is given. For direct sister groups of endemic Malagasy clades, the clade number with the notion sg for "sister group" is given. \* indicate sequences extracted from whole-genome shotgun sequences.

| Genus                  | Species                 | Clade no. | RAG1                            | BDNF                        |
|------------------------|-------------------------|-----------|---------------------------------|-----------------------------|
| <i>Suricata</i>        | <i>suricata</i>         | sg 31     | JQ073171                        | JQ073048                    |
| <i>Fossa</i>           | <i>fossana</i>          | 31        | JQ073172                        | JQ073049                    |
| <i>Cryptoprocta</i>    | <i>ferox</i>            | 31        | JQ073173                        | JQ073050                    |
| <i>Otolemur</i>        | <i>garnettii</i>        | sg 28     | AAQR03002574.1*                 | AAQR03002289.1*             |
| <i>Daubentonia</i>     | <i>madagascariensis</i> | 28        | JQ073174                        | JQ073051                    |
| <i>Lepilemur</i>       | <i>edwardsi</i>         | 28        | JQ073175                        | JQ073052                    |
| <i>Microcebus</i>      | <i>murinus</i>          | 28        | ABDC01016729.1*/ABDC01016728.1* | EU142161                    |
| <i>Steatomys</i>       | sp. "gautuni"           | sg 30     | JQ073176                        | JQ073053                    |
| <i>Brachytarsomys</i>  | <i>albicauda</i>        | 30        | JQ073177                        | JQ073054                    |
| <i>Hypogeomys</i>      | <i>antimena</i>         | 30        | JQ073178                        | JQ073055                    |
| <i>Micropotamogale</i> | <i>lamottei</i>         | sg 29     | JQ073179                        | JQ073056                    |
| <i>Limnogale</i>       | <i>mergulus</i>         | 29        | JQ073180                        | JQ073057                    |
| <i>Echinops</i>        | <i>tefairii</i>         | 29        | JQ073181                        | AAIY01688610.1*             |
| <i>Lama</i>            | spp.                    |           | <i>L. glama</i><br>AF305953     | <i>L. pacos</i><br>JQ073058 |
| <i>Bos</i>             | <i>taurus</i>           |           | DAAA02041329.1*                 | DAAA02041147.1*             |
| <i>Sus</i>             | <i>scrofa</i>           |           | AB091392                        | NM214259                    |
| <i>Diceros</i>         | <i>bicornis</i>         |           | JQ073182                        | JQ073059                    |
| <i>Equus</i>           | <i>caballus</i>         |           | NC009155                        | AB264324                    |
| <i>Ailuropoda</i>      | <i>melanoleuca</i>      |           | ACTA01092121.1*                 | U56638*                     |
| <i>Felis</i>           | <i>catus</i>            |           | ACBE01349034.1*                 | ACBE01347057.1*             |
| <i>Homo</i>            | <i>sapiens</i>          |           | NM000448                        | NM170735                    |
| <i>Oryctolagus</i>     | <i>cuniculus</i>        |           | M77666                          | AAGW02037408.1*             |
| <i>Ochotona</i>        | <i>princeps</i>         |           | JQ073183                        | JQ073060                    |
| <i>Elephas</i>         | <i>maximus</i>          |           | EF551560/AY125021               | JQ073061                    |
| <i>Procavia</i>        | <i>capensis</i>         |           | ABRQ01060068.1*                 | JQ073062                    |
| <i>Trichechus</i>      | <i>manatus</i>          |           | JQ073184                        | JQ073063                    |
| <i>Monodelphis</i>     | <i>domestica</i>        |           | U51897                          | AAFR03017856.1*             |
| <i>Ornithorhynchus</i> | <i>anatinus</i>         |           | AAPN01039734.1                  | AAPN01345083.1*             |
| <i>Dasybus</i>         | <i>novemcinctus</i>     |           | AAGV020408147.1*                | AAGV020138133.1*            |
| <i>Myotis</i>          | <i>lucifugus</i>        |           | AAPE02039491.1*                 | AAPE02023582.1*             |
| <i>Pan</i>             | <i>troglydytes</i>      |           | AACZ03078426.1*                 | AACZ03081690.1*             |
| <i>Erinaceus</i>       | <i>europaeus</i>        |           | AANN01829829.1*                 | AANN01683139.1*             |

|                        |                                    |       |                       |                 |
|------------------------|------------------------------------|-------|-----------------------|-----------------|
| <i>Macaca</i>          | <i>mulatta</i>                     |       | NW001100721.1*        | AANU01216369.1* |
| <i>Mus</i>             | <i>musculus</i>                    |       | AEKR01051132.1*       | AEKR01039813.1* |
| <i>Rattus</i>          | <i>norvegicus</i>                  |       | AABR05104208.1*       | X67108          |
| <i>Spermophilus</i>    | <i>tridecemlineatus</i>            |       | AAQQ01493562.1*       | AAQQ01153161.1* |
| <i>Zonosaurus</i>      | <i>madagascariensis</i>            | 19    | JQ073185              | JQ073064        |
| <i>Tracheloptychus</i> | <i>madagascariensis</i>            | 19    | JQ073186              | JQ073065        |
| <i>Gerrhosaurus</i>    | sp. cf.                            | sg 19 | JQ073187              | JQ073066        |
|                        | <i>nigrolineatus</i>               |       |                       |                 |
| <i>Oplurus</i>         | <i>cuvieri</i>                     | 17    | JQ073188              | JQ073067        |
| <i>Chalarodon</i>      | <i>madagascariensis</i>            | 17    | JQ073189              | JQ073068        |
| <i>Diplolaemus</i>     | <i>darwinii</i>                    | sg 17 | JQ073190              | JQ073069        |
| <i>Sanzinia</i>        | <i>madagascariensis</i>            | 14    | JQ073191              | JQ073070        |
|                        | <i>olontany</i>                    |       |                       |                 |
| <i>Acrantophis</i>     | <i>madagascariensis</i>            | 14    | JQ073192              | JQ073071        |
| <i>Corallus</i>        | <i>caninus</i>                     |       | JQ073193              | JQ073072        |
| <i>Calabaria</i>       | <i>reinhardtii</i>                 | sg 14 | EU402839/<br>AY487391 | EU402631        |
| <i>Madascincus</i>     | <i>melanopleura</i>                | 21    | JQ073194              | JQ073073        |
| <i>Amphiglossus</i>    | <i>macrocerus</i>                  | 21    | JQ073195              | JQ073074        |
| <i>Scelotes</i>        | <i>mirus</i>                       | sg 21 | JQ073196              | JQ073075        |
| <i>Lycodryas</i>       | <i>citrinus</i>                    | 15    | JQ073197              | JQ073076        |
| <i>Madagascarophis</i> | <i>meridionalis</i>                | 15    | JQ073198              | JQ073077        |
| <i>Liopholidophis</i>  | <i>lateralis</i>                   | 15    | JQ073199              | JQ073078        |
| <i>Ditypophis</i>      | <i>vivax</i>                       | sg 15 | JQ073200              | JQ073079        |
| <i>Lycodryas</i>       | <i>sanctijohannis</i>              | 15    | JQ073201              | JQ073080        |
| <i>Mimophis</i>        | <i>mahfalensis</i>                 | 16    | JQ073202              | JQ073081        |
| <i>Psammophis</i>      | sp. (Namibia)                      | sg 16 | JQ073203              | JQ073082        |
| <i>Trachylepis</i>     | <i>aureopunctatus</i>              | 20    | JQ073204              | JQ073083        |
| <i>Trachylepis</i>     | <i>gravenhorstii</i>               | 20    | JQ073205              | JQ073084        |
| <i>Trachylepis</i>     | <i>capensis</i>                    | sg 20 | JQ073206              | JQ073085        |
| <i>Calumma</i>         | <i>brevicornis</i>                 | 18    | JQ073207              | JQ073086        |
| <i>Furcifer</i>        | <i>lateralis</i>                   | 18    | JQ073208              | JQ073087        |
| <i>Brookesia</i>       | <i>nasus</i>                       | 18    | JQ073209              | JQ073088        |
| <i>Brookesia</i>       | <i>thieli</i>                      | 18    | JQ073210              | JQ073089        |
| <i>Trioceros</i>       | <i>jacksoni</i>                    | (18)  | JQ073211              | JQ073090        |
| <i>Rhampholeon</i>     | <i>spectrum</i>                    | (18)  | JQ073212              | JQ073091        |
| <i>Bradypodion</i>     | <i>damaranum</i>                   | (18)  | JQ073213              | JQ073092        |
| <i>Furcifer</i>        | <i>cephalolepis</i>                | (18)  | JQ073214              | JQ073093        |
| <i>Furcifer</i>        | <i>polleni</i>                     | (18)  | JQ073215              | JQ073094        |
| <i>Pelomedusa</i>      | <i>subrufa</i>                     |       | JQ073216              | JQ073095        |
| <i>Pelomedusa</i>      | <i>subrufa</i>                     |       | JQ073217              | JQ073096        |
| <i>Pelusios</i>        | <i>castanoides</i><br>(Mozambique) |       | JQ073218              | JQ073097        |
| <i>Pelusios</i>        | <i>castanoides</i><br>(Madagascar) |       | JQ073219              | JQ073098        |
| <i>Erymnochelys</i>    | <i>madagascariensis</i>            | 9     | JQ073220              | JQ073099        |
| <i>Podocnemis</i>      | <i>expansa</i>                     | sg 9  | JQ073221              | JQ073100        |
| <i>Astrochelys</i>     | <i>radiata</i>                     | 10    | JQ073222              | JQ073101        |
| <i>Pyxis</i>           | <i>arachnoides</i>                 | 10    | JQ073223              | JQ073102        |
| <i>Stigmochelys</i>    | <i>pardalis</i>                    | sg 10 | JQ073224              | JQ073103        |
| <i>Phelsuma</i>        | <i>madagascariensis</i>            | 22    | JQ073225              | JQ073104        |
| <i>Phelsuma</i>        | <i>lineata</i>                     | 22    | JQ073226              | JQ073105        |
| <i>Phelsuma</i>        | <i>astriata</i>                    | (22)  | JQ073227              | JQ073106        |
| <i>Phelsuma</i>        | <i>nigristriata</i>                | (22)  | JQ073228              | JQ073107        |
| <i>Phelsuma</i>        | <i>comorensis</i>                  | (22)  | JQ073229              | JQ073108        |
| <i>Phelsuma</i>        | <i>inexpectata</i>                 | (22)  | JQ073230              | JQ073109        |
| <i>Phelsuma</i>        | <i>ornata</i>                      | (22)  | JQ073231              | JQ073110        |
| <i>Lygodactylus</i>    | <i>bivittis</i>                    | 23    | JQ073232              | JQ073111        |
| <i>Lygodactylus</i>    | <i>expectatus</i>                  | 23    | JQ073233              | JQ073112        |
| <i>Lygodactylus</i>    | <i>tolampyae</i>                   | 23    | JQ073234              | JQ073113        |
| <i>Lygodactylus</i>    | <i>picturatus</i>                  | (23)  | JQ073235              | JQ073114        |
| <i>Lygodactylus</i>    | sp.                                | (23)  | JQ073236              | JQ073115        |

|                        |                         |             |                                                            |                                 |
|------------------------|-------------------------|-------------|------------------------------------------------------------|---------------------------------|
| <i>Blaesodactylus</i>  | <i>antongilensis</i>    | 24          | JQ073238                                                   | JQ073117                        |
| <i>Homopholis</i>      | <i>wahlbergii</i>       | sg 24       | JQ073237                                                   | JQ073116                        |
| <i>Paroedura</i>       | <i>stumpffi</i>         | 25          | JQ073239                                                   | JQ073118                        |
| <i>Uroplatus</i>       | <i>giganteus</i>        | 26          | JQ073240                                                   | JQ073119                        |
| <i>Afrogecko</i>       | <i>porphyreus</i>       | sg<br>25/26 | JQ073241                                                   | JQ073120                        |
| <i>Chondrodactylus</i> | <i>angulifer</i>        |             | JQ073242                                                   | JQ073121                        |
| <i>Paroedura</i>       | <i>sanctijohannis</i>   | (25)        | JQ073243                                                   | JQ073122                        |
| <i>Hemidactylus</i>    | <i>mercatorius</i>      | 27          | JQ073244                                                   | JQ073123                        |
| <i>Hemidactylus</i>    | <i>platycephalus</i>    |             | JQ073246                                                   | JQ073125                        |
| <i>Hemidactylus</i>    | <i>mabouia</i>          | sg 27       | JQ073245                                                   | JQ073124                        |
| <i>Crocodylus</i>      | <i>niloticus</i>        | 11          | JQ073247                                                   | JQ073126                        |
| <i>Crocodylus</i>      | <i>niloticus</i>        | sg 11       | JQ073248                                                   | JQ073127                        |
| <i>Typhlops</i>        | <i>andasibensis</i>     | 13          | JQ073249                                                   | GU902453                        |
| <i>Xenotyphlops</i>    | <i>grandidieri</i>      | 12          | JQ073250                                                   | GU902457                        |
| <i>Typhlops</i>        | <i>arenarius</i>        | 13          | GU902699                                                   | GU902455                        |
| <i>Typhlops</i>        | <i>jamaicensis</i>      |             | EU402866                                                   | EU402664                        |
| <i>Leptotyphlops</i>   | <i>humilis</i>          |             | EU402851                                                   | EU402648                        |
| <i>Afrottyphlops</i>   | <i>punctatus</i>        |             | GU902645                                                   | GU902395                        |
| <i>Gerrhophilus</i>    | <i>mirus</i>            |             | GU902644                                                   | GU902394                        |
| <i>Chalcides</i>       | <i>sexlineatus</i>      |             | JQ073251                                                   | JQ073128                        |
| <i>Chalcides</i>       | <i>viridanus</i>        |             | JQ073252                                                   | JQ073129                        |
| <i>Gallotia</i>        | <i>atlantica</i>        |             | JQ073253                                                   | JQ073130                        |
| <i>Gallotia</i>        | <i>galloti</i>          |             | JQ073254                                                   | JQ073131                        |
| <i>Gallotia</i>        | <i>stehlini</i>         |             | JQ073255                                                   | JQ073132                        |
| <i>Tarentola</i>       | <i>angustimentalis</i>  |             | JQ073256                                                   | JQ073133                        |
| <i>Tarentola</i>       | <i>boettgeri</i>        |             | JQ073257                                                   | JQ073134                        |
| <i>Tarentola</i>       | <i>delalandii</i>       |             | JQ073258                                                   | JQ073135                        |
| <i>Sphenodon</i>       | <i>punctatus</i>        |             | AY662576                                                   | GU457846                        |
| <i>Phrynocephalus</i>  | spp.                    |             | <i>P. raddei</i><br>AY662586                               | <i>P. mystaceus</i><br>DQ340735 |
| <i>Leiolepis</i>       | <i>belliana</i>         |             | FJ356734                                                   | AY987965                        |
| <i>Gallus</i>          | <i>gallus</i>           |             | NM001031188                                                | NM001031616                     |
| <i>Dermochelys</i>     | <i>coriacea</i>         |             | FJ039918                                                   | FJ039908                        |
| <i>Taeniopygia</i>     | <i>guttata</i>          |             | XM002199682                                                | DQ086496                        |
| <i>Rhea</i>            | <i>americana</i>        |             | DQ881836                                                   | EU737942                        |
| <i>Alligator</i>       | <i>mississippiensis</i> |             | AF143724                                                   | EU275888                        |
| <i>Caiman</i>          | <i>latirostris</i>      |             | AY239167                                                   | EF646298                        |
| <i>Blanus</i>          | <i>strauchi</i>         |             | AY444050                                                   | FJ441847                        |
| <i>Rhineura</i>        | <i>floridana</i>        |             | AY662618                                                   | GU457878                        |
| <i>Varanus</i>         | spp.                    |             | <i>V. salvator</i> EU402828/<br><i>V. griseus</i> AY662608 | EU402618                        |
| <i>Boophis</i>         | <i>doulioti</i>         | 4           | JQ073259                                                   | JQ073138                        |
| <i>Blommersia</i>      | <i>wittei</i>           | 4           | AY323774                                                   | EF396018                        |
| <i>Boophis</i>         | sp. "Comoros"           | 4           | JQ073260                                                   | JQ073139                        |
| <i>Blommersia</i>      | sp. "Comoros"           | 4           | AY323775                                                   | EF396017                        |
| <i>Polypedates</i>     | <i>cruciger</i>         | sg 4        | JQ073261                                                   | JQ073140                        |
| <i>Dyscophus</i>       | <i>antongili</i>        | 6           | EF396084                                                   | EF396005                        |
| <i>Dyscophus</i>       | <i>insularis</i>        | 6           | EF396083                                                   | EF396006                        |
| <i>Kaloula</i>         | <i>pulchra</i>          | sg 5/6      | EF396091                                                   | EF396015                        |
| <i>Scaphiophryne</i>   | <i>calcarata</i>        | 5           | EF396106                                                   | EF396032                        |
| <i>Rhombophryne</i>    | <i>testudo</i>          | 5           | EF396105                                                   | EF396031                        |
| <i>Microhyla</i>       | <i>pulchra</i>          | sg 5/6      | EF396093                                                   | EF396021                        |
| <i>Heterixalus</i>     | <i>tricolor</i>         | 7           | JQ073262                                                   | JQ073141                        |
| <i>Heterixalus</i>     | <i>madagascariensis</i> | 7           | JQ073263                                                   | JQ073142                        |
| <i>Tachycnemis</i>     | <i>seychellensis</i>    | (7)         | JQ073264                                                   | JQ073143                        |
| <i>Hyperolius</i>      | <i>viridiflavus</i>     | sg 7        | AY323769                                                   | EF396013                        |
| <i>Ptychadena</i>      | <i>mascareniensis</i>   | 8           | JQ073265                                                   | JQ073144                        |
| <i>Ptychadena</i>      | <i>mascareniensis</i>   | 8           | JQ073266                                                   | JQ073145                        |
| <i>Ptychadena</i>      | <i>mascareniensis</i>   | sg 8        | JQ073267                                                   | JQ073146                        |
| <i>Alytes</i>          | <i>dickhilleni</i>      |             | JQ073268                                                   | JQ073147                        |

|                                               |                          |      |                                       |                                      |
|-----------------------------------------------|--------------------------|------|---------------------------------------|--------------------------------------|
| <i>Alytes</i>                                 | <i>muletensis</i>        |      | AY323755                              | EF407510                             |
| <i>Discoglossus</i>                           | <i>galganoi jeanneae</i> |      | JQ073269                              | JQ073148                             |
| <i>Discoglossus</i>                           | <i>scovazzi</i>          |      | JQ073270                              | JQ073149                             |
| <i>Calyptocephalella</i>                      | <i>gayi</i>              |      | AY583337                              | JQ073150                             |
| <i>Lechrodus</i>                              | <i>melanopyga</i>        |      | JQ073271                              | JQ073151                             |
| <i>Hymenochirus</i>                           | <i>boettgeri</i>         |      | JQ073272                              | JQ073152                             |
| <i>Pipa</i>                                   | <i>parva</i>             |      | AY323761                              | EF407512                             |
| <i>Xenopus</i>                                | <i>leavis</i>            |      | L19324                                | BC082887                             |
| <i>Agalychnis</i>                             | <i>callidryas</i>        |      | AY323765                              | EF407508                             |
| <i>Litoria</i>                                | <i>caerulea</i>          |      | AY323767                              | EF407509                             |
| <i>Plethodon</i>                              | <i>hoffmanni</i>         |      | EU275801                              | EU275883                             |
| <i>Andrias</i>                                | <i> davidianus</i>       |      | AY650142                              | EU275889                             |
| <i>Ambystoma</i>                              | <i>mexicanum</i>         |      | AY323752                              | EF195175                             |
| <i>Pleurodeles</i>                            | <i>poireti</i>           |      | EU275787                              | EF453368                             |
| <i>Dermophis</i>                              | <i>mexicanus</i>         |      | JQ073273                              | JQ073153                             |
| <i>Typhlonectes</i>                           | <i>natans</i>            |      | JQ073274                              | JQ073154                             |
| <i>Paretroplus</i>                            | <i>polyactis</i>         | 3    | JQ073275                              | JQ073155                             |
| <i>Paratilapia</i>                            | sp.                      | 3    | JQ073276                              | JQ073156                             |
| <i>Etroplus</i>                               | <i>maculatus</i>         | 3    | JQ073277                              | JQ073157                             |
| <i>Maylandia</i>                              | <i>estherae</i>          |      | JQ073278                              | JQ073158                             |
| <i>Aristochromis</i>                          | <i>christyi</i>          |      | JQ073279                              | JQ073159                             |
| <i>Gnathochromis</i>                          | <i>permaxillaris</i>     |      | JQ073280                              | JQ073160                             |
| <i>Altalamprologus</i>                        | <i>compressiceps</i>     |      | JQ073281                              | JQ073161                             |
| <i>Amphilophus</i>                            | sp.                      |      | JQ073282                              | JQ073162                             |
| <i>Pachypanchax</i>                           | <i>sakaramyi</i>         | 2    | JQ073283                              | JQ073163                             |
| <i>Aphyosemion</i>                            | sp.                      |      | JQ073284                              | JQ073164                             |
| <i>Aplocheilus</i>                            | sp.                      | sg 2 | JQ073285                              | JQ073165                             |
| <i>Bedotia</i>                                | sp. "Nosy Boraha"        | 1    | JQ073286                              | JQ073166                             |
| <i>Melanotaenia</i>                           | sp.                      | sg 1 | JQ073287                              | JQ073167                             |
| <i>Melanotaenia</i>                           | sp.                      | sg 1 | JQ073288                              | JQ073168                             |
| Anguillidae<br>( <i>Ophichthus/Anguilla</i> ) |                          |      | <i>Ophichthus gomesii</i><br>AY430203 | <i>Anguilla anguilla</i><br>AY762996 |
| <i>Takifugu</i>                               | <i>rubripes</i>          |      | AF108420                              | CAAB01000551                         |
| <i>Tetraodon</i>                              | <i>nigroviridis</i>      |      | CAAE01014715.1                        | CAAE01009551.1                       |
| <i>Danio</i>                                  | <i>rerio</i>             |      | NM131389                              | BC066399                             |
| <i>Dicentrarchus</i>                          | <i>labrax</i>            |      | EF095651                              | FJ711591                             |
| <i>Oncorhynchus</i>                           | <i>mykiss</i>            |      | U15663                                | GU108576                             |
| <i>Erpetoichthys</i>                          | <i>calabaricus</i>       |      | JQ073291                              | MISSING                              |
| <i>Protopterus</i>                            | ssp.                     |      | <i>P.dolloi</i><br>AY442928           | <i>P. sp.</i><br>EU275856            |
| <i>Latimeria</i>                              | <i>menadoensis</i>       |      | JQ073290                              | JQ073170                             |
| <i>Squalus</i>                                | <i>acantias</i>          |      | JQ073289                              | JQ073169                             |
| <i>Callorhinchus</i>                          | <i>mili</i>              |      | AAVX01004067.1*                       | AAVX01645327*                        |

**Table S3.** Bayes factors. 2ln Bayes factors results of comparisons of all four partitioning strategies with the concatenated dataset. Bayes factors were calculated from estimated harmonic means of likelihoods by the sump command in MrBayes, and subsequently the partition strategy P3 was chosen for the final analysis.

| Partition | N partitions | Partition identity                                                                       | Harmonic mean | P3       | P1       | P2       |
|-----------|--------------|------------------------------------------------------------------------------------------|---------------|----------|----------|----------|
| P4        | 2            | BDNF gene; RAG1 gene                                                                     | -203384.91    | -5060.38 | -3971.34 | -3426.76 |
| P2        | 6            | BDNF codon positions;<br>RAG1 codon positions                                            | -201671.53    | -1633.62 | -544.58  | -        |
| P1        | 1            | All data combined                                                                        | -201399.24    | -1089.04 | -        | -        |
| P3        | 2            | 1st and 2nd positions of<br>both BDNF and RAG1;<br>3rd position of both BDNF<br>and RAG1 | -200854.72    | -        | -        | -        |

**Table S4.** Detailed list and descriptions of age constraints used for calculation of timetrees, with references for each constraint. Clade numbers as described in Materials and Methods of main paper. Calibrations C15 and C16 (marked with an asterisk) were excluded because of doubts on fossil identity; C19, C27 and C29 (marked with two asterisks) were excluded because of their poor performance in cross-validation tests.

| Constraintnumber | Major taxon    | Kind of constraint | Description                                                                                                                                                                               | Constraint age | Reference |
|------------------|----------------|--------------------|-------------------------------------------------------------------------------------------------------------------------------------------------------------------------------------------|----------------|-----------|
| C43              | Actinopterygii | island / lake      | Oldest age of Lake Malawi cichlids                                                                                                                                                        | <2             | S25       |
| C42              | Actinopterygii | island / lake      | Oldest age of Lake Tanganyika cichlids                                                                                                                                                    | <12            | S25       |
| C44              | Actinopterygii | fossil             | split of cichlids from other Percomorpha (oldest fossils: Eocene cichlid)                                                                                                                 | >45            | S26       |
| C46              | Actinopterygii | fossil             | Split of Tetraodontiformes from other percomorphs [earliest fossil tetraodontiform from the Cenomanian (Cretaceous)]                                                                      | >98            | S27       |
| C47              | Actinopterygii | fossil             | Split of Ostariophysii ( <i>Danio</i> ) from other fishes (earliest stem ostariophysian: Tischlingerichthys from Tithonian (Jurassic))                                                    | >146           | S27       |
| C48              | Actinopterygii | fossil             | Split of Elopomorpha = <i>Anguilla</i> from other fishes (stem-elopomorph <i>Elopsomolos</i> ) in the the Kimmeridgian (Jurassic)                                                         | >151           | S27       |
| C45              | Actinopterygii | fossil             | Minimum age of Actinopterygii known from the Givetian/Eifelian boundary (earliest stem Actinopteri)                                                                                       | >392           | S27       |
| C39              | Lissamphibia   | fossil             | Minimum age of split of hynobiid and cryptobranchid salamanders (oldest fossil: cryptobranchid record)                                                                                    | >161           | S28       |
| C38              | Lissamphibia   | vicariance         | Minimum age of the separation among African and South American pipid frogs (continental separation of Africa and South America)                                                           | >86            | S28       |
| C31              | Lissamphibia   | vicariance         | Split of Spanish/Moroccan <i>Discoglossus</i> at end of Messinian salinity crisis                                                                                                         | >5.3           | S29       |
| C32              | Lissamphibia   | vicariance         | Split of Spanish/Moroccan <i>Alytes</i> at end of Messinian salinity crisis                                                                                                               | >5.3           | S29       |
| C37              | Lissamphibia   | vicariance         | Minimum age of the split between <i>Agalychnis</i> and <i>Litoria</i> (last connection between Australia and South America)                                                               | >42            | S28       |
| C36              | Lissamphibia   | fossil             | Minimum age of <i>Calyptocephalella</i> (oldest fossils) = minimum age of the split between <i>Calyptocephalella</i> and <i>Lechriodus</i> (fossil records of <i>Calyptocephalella</i> ). | >53            | S28       |
| C33              | Lissamphibia   | island / lake      | Maximum age of the split between Malagasy/Comoran <i>Blommersia</i> earlier than rise of Mayotte (volcanic origin of the oldest Comoro island Mayotte)                                    | <15            | S30       |
| C34              | Lissamphibia   | island / lake      | Split of Malagasy/Comoran <i>Boophis</i> earlier than rise of Mayotte                                                                                                                     | <15            | S30       |
| C41              | Lissamphibia   | fossil             | The oldest fossils attributed to the Discoglossidae ( <i>Eodiscoglossus oxoniensis</i> ) split Discoglossids other frogs                                                                  | >167           | S31       |
| C40              | Lissamphibia   | fossil             | Minimum age of the split of pipid frogs from their sister group (records of Mesozoic fossil pipids, oldest fossil)                                                                        | >140           | S28       |
| C35              | Lissamphibia   | fossil             | Minimum age of frog-salamander split (fossil record of frog ancestor <i>Triadobatrachus</i> )                                                                                             | >230           | S28       |
| C5               | Archosauria    | fossil             | Alligator-Caiman split                                                                                                                                                                    | 66–71          | S32       |

|       |               |               |                                                                                                                                            |              |     |
|-------|---------------|---------------|--------------------------------------------------------------------------------------------------------------------------------------------|--------------|-----|
| C4    | Archosauria   | fossil        | Split between birds and crocodiles                                                                                                         | 235–250.4*   | S32 |
| C10   | Archosauria   | fossil        | Split of sea turtles from their sister group (oldest sea turtle fossil <i>Santanachelys</i> )                                              | >110         | S33 |
| C7    | Archosauria   | fossil        | <i>Erymnochelys</i> – <i>Podocnemis</i> split (fossil of <i>Erymnochelys</i> )                                                             | >65          | S34 |
| C6    | Archosauria   | fossil        | <i>Pelomedusa</i> – <i>Pelusios</i> split                                                                                                  | >25          | S34 |
| C9    | Archosauria   |               | Split between Podocnemididae – Pelomedusidae                                                                                               | >100         | S34 |
| C8    | Archosauria   | fossil        | Split between Cryptodira and Pleurodira                                                                                                    | >210         | S34 |
| C11   | Archosauria   | fossil        | Split of turtles from other reptiles (oldest turtle fossil, <i>Odontochelys</i> )                                                          | >220         | S35 |
| C20   | Squamata      | island / lake | Canary island colonization by geckos ( <i>Tarentola boettgeri</i> – <i>T. delalandi</i> ) – age emergence of island Gran Canaria           | <14          | S36 |
| C22   | Squamata      | island / lake | Split of <i>Phelsuma comorensis</i> from Malagasy <i>Phelsuma</i> – oldest age of Mayotte                                                  | <15          | S30 |
| C21   | Squamata      | island / lake | Split of <i>Phelsuma nigristriata</i> from Malagasy <i>Phelsuma</i> – oldest age of Mayotte                                                | <15          | S30 |
| C23   | Squamata      | island / lake | Split between <i>Phelsuma inexpectata</i> – <i>P. ornata</i> (max age of Reunion colonized by <i>inexpectata</i> from the older Mauritius) | <2.1         | S30 |
| C19** | Squamata      | island / lake | Canary island colonization by lizards ( <i>Gallotia stehlini</i> – <i>G. atlantica</i> ) – age emergence of island Gran Canaria            | <14          | S36 |
| C14   | Squamata      | fossil        | Amphisbaenian – lacertid split (fossil rhineurid)                                                                                          | > 64         | S37 |
| C17   | Squamata      | fossil        | Split of Booidea from Caenophidia (earliest booid fossil)                                                                                  | >75          | S34 |
| C18   | Squamata      | island / lake | Split of Comoran <i>Furcifer</i> from Malagasy taxa (max. age of Mayotte)                                                                  | <15          | S30 |
| C15*  | Squamata      | fossil        | Split of acrodont iguanians                                                                                                                | >165         | S34 |
| C16*  | Squamata      | fossil        | Split of iguanians (fossil of <i>Bharatagama</i> , Middle Jurassic) from other lizards                                                     | >180         | S34 |
| C24   | Squamata      | island / lake | Canary island colonization by lizards ( <i>Chalcides sexlineatus</i> – <i>C. viridanus</i> ) – age of island Gran Canaria                  | <14          | S36 |
| C13   | Squamata      | fossil        | Split of geckos from other squamates (oldest fossil gecko eggs)                                                                            | >55          | S38 |
| C12   | Squamata      | fossil        | <i>Sphenodon</i> – squamate split (earliest rhynchocephalian)                                                                              | >228         | S37 |
| C3    | Squamata      | fossil        | Split between archosaurs and lepidosaurs                                                                                                   | 259.7–299.8* | S32 |
| C27** | Mammalia      | fossil        | Split Paenungulata                                                                                                                         | 54–65        | S2  |
| C28   | Mammalia      | fossil        | Split Lagomorpha                                                                                                                           | 48.6–61.5    | S39 |
| C29** | Mammalia      | fossil        | Split Primates                                                                                                                             | 55.5–65.8    | S39 |
| C26   | Mammalia      | fossil        | Split between horse – rhino                                                                                                                | 54–58        | S2  |
| C30   | Mammalia      | fossil        | Split Cetartiodactyla                                                                                                                      | 55–65        | S2  |
| C25   | Mammalia      | fossil        | Split between Caniformis – Feliformis                                                                                                      | 42.8–63.8    | S40 |
| C1    | Tetrapoda     | fossil        | Split between diapsids and synapsids                                                                                                       | 338–288      | S41 |
| C2    | Sarcopterygii | fossil        | Split between lungfish and tetrapods                                                                                                       | 408–419      | S32 |

**Table S5.** Results of cross validation procedures (CV2 and CV3; CV1 was an automated procedure described in the main text) carried out on the set of age constraints as detailed in Table S4. Constraint numbers as in Table S4 and main paper. Two different series of cross validations were carried out: in CV2 all constraints except one were in turn excluded, while in CV3, one constraint was in turn excluded. The first three columns show by how many CV2 analyses a certain constraint was recovered, considering either only the absolute age estimate, or the standard error (SE), or the credibility intervals (CrIs). The next three columns show for CV2 how many other constraints were recovered by the analysis based on each single constraint, based on absolute estimates, SE or CI. The last three columns show for CV3 whether the excluded constraint was recovered by the analysis, based on absolute age estimate or considering SE or CI. Red colour marks particularly poor performance values for a constraint in being recovered or recovering other constraints in CV2, or negative results in CV3.

| Constraint number | CV2 Recovered | CV2 Recovered (SE) | CV2 Recovered (CrI) | CV2 Recovers | CV2 Recovers (SE) | CV2 Recovers (CrI) | CV3 Recovered | CV3 Recovered (SD) | CV3 Recovered (CrI) |
|-------------------|---------------|--------------------|---------------------|--------------|-------------------|--------------------|---------------|--------------------|---------------------|
| C43               | 47            | 47                 | 47                  | 27 (29)      | 42 (43)           | 45                 | Yes           | Yes                | Yes                 |
| C42               | 9 (15)        | 47                 | 47                  | 29           | 42 (43)           | 45 (46)            | Almost        | Yes                | Yes                 |
| C44               | 47            | 47                 | 47                  | 26 (28)      | 41 (43)           | 45                 | Yes           | Yes                | Yes                 |
| C46               | 45            | 47                 | 47                  | 25 (27)      | 40                | 45                 | Yes           | Yes                | Yes                 |
| C47               | 47            | 47                 | 47                  | 26 (28)      | 42 (43)           | 45                 | Yes           | Yes                | Yes                 |
| C48               | 47            | 47                 | 47                  | 26 (28)      | 41 (42)           | 45                 | Yes           | Yes                | Yes                 |
| C45               | 3             | 39                 | 43                  | 26 (27)      | 40                | 42                 | No            | No                 | No                  |
| C39               | 47            | 47                 | 47                  | 26 (28)      | 41 (42)           | 45                 | Yes           | Yes                | Yes                 |
| C38               | 47            | 47                 | 47                  | 26 (28)      | 42 (43)           | 45                 | Yes           | Yes                | Yes                 |
| C31               | 47            | 47                 | 47                  | 25 (28)      | 42                | 45                 | Yes           | Yes                | Yes                 |
| C32               | 47            | 47                 | 47                  | 26 (28)      | 41 (43)           | 45                 | Yes           | Yes                | Yes                 |
| C37               | 46            | 47                 | 47                  | 25 (27)      | 41                | 45                 | Yes           | Yes                | Yes                 |
| C36               | 47            | 47                 | 47                  | 26 (28)      | 42 (43)           | 45                 | Yes           | Yes                | Yes                 |
| C33               | 2 (4)         | 47                 | 47                  | 30 (34)      | 41 (43)           | 46                 | Yes           | Yes                | Yes                 |
| C34               | 1             | 47                 | 47                  | 30 (33)      | 40 (41)           | 46                 | Almost        | Yes                | Yes                 |
| C41               | 47            | 47                 | 47                  | 24 (27)      | 42 (43)           | 45                 | Yes           | Yes                | Yes                 |
| C40               | 47            | 47                 | 47                  | 26 (27)      | 42 (43)           | 45                 | Yes           | Yes                | Yes                 |
| C35               | 47            | 47                 | 47                  | 26 (27)      | 42 (43)           | 45                 | Yes           | Yes                | Yes                 |
| C5                | 2 (9)         | 46                 | 46                  | 29 (31)      | 42 (43)           | 45                 | No            | Yes                | Yes                 |
| C4                | 9 (15)        | 41                 | 45                  | 29 (31)      | 39 (41)           | 45                 | Almost        | Yes                | Yes                 |
| C10               | 47            | 47                 | 47                  | 26 (28)      | 42 (43)           | 45                 | Yes           | Yes                | Yes                 |
| C7                | 47            | 47                 | 47                  | 26 (28)      | 42 (43)           | 45                 | Yes           | Yes                | Yes                 |
| C6                | 47            | 47                 | 47                  | 26 (28)      | 42                | 45                 | Yes           | Yes                | Yes                 |
| C9                | 46            | 47                 | 47                  | 26 (28)      | 41 (42)           | 45                 | Yes           | Yes                | Yes                 |
| C8                | 42            | 45 (46)            | 47                  | 25 (27)      | 39 (40)           | 44                 | Yes           | Yes                | Yes                 |

|     |         |         |         |         |         |         |        |     |        |
|-----|---------|---------|---------|---------|---------|---------|--------|-----|--------|
| C11 | 45      | 47      | 47      | 26 (28) | 41      | 45      | Yes    | Yes | Yes    |
| C20 | 38 (44) | 47      | 47      | 29 (30) | 41 (42) | 46      | Yes    | Yes | Yes    |
| C22 | 47      | 47      | 47      | 26 (29) | 42 (43) | 46      | Yes    | Yes | Yes    |
| C21 | 1 (4)   | 45 (47) | 47      | 30 (33) | 41      | 46      | No     | Yes | Yes    |
| C23 | 1       | 47      | 47      | 29 (31) | 41      | 46      | No     | Yes | Yes    |
| C19 | 0       | 8 (32)  | 44 (45) | 33 (35) | 40      | 45      | No     | No  | No     |
| C14 | 47      | 47      | 47      | 26 (29) | 42 (43) | 45      | Yes    | Yes | Yes    |
| C17 | 0       | 3 (4)   | 41 (44) | 29 (30) | 38      | 42 (44) | No     | Yes | Yes    |
| C18 | 47      | 47      | 47      | 30 (31) | 40 (42) | 45 (46) | Yes    | Yes | Yes    |
| C15 | 2       | 32      | 42 (43) | 28 (29) | 37 (38) | 40      | Yes    | Yes | Yes    |
| C16 | 2       | 30 (32) | 41 (42) | 28 (29) | 37 (38) | 40      | Almost | Yes | Yes    |
| C24 | 47      | 47      | 47      | 27 (31) | 42 (43) | 45      | Yes    | Yes | Yes    |
| C13 | 47      | 47      | 47      | 26 (29) | 42 (43) | 45 (46) | Yes    | Yes | Yes    |
| C12 | 45 (46) | 45 (46) | 47      | 25 (28) | 40      | 45      | Yes    | Yes | Yes    |
| C3  | 6 (7)   | 42      | 45      | 31 (32) | 39 (40) | 42 (43) | Yes    | Yes | Yes    |
| C27 | 1       | 2       | 29 (32) | 27 (29) | 37 (38) | 43      | No     | Yes | Yes    |
| C28 | 1       | 3       | 40      | 29 (32) | 38      | 43 (46) | Yes    | Yes | Yes    |
| C29 | 0       | 0       | 1 (2)   | 24 (25) | 36      | 40      | No     | No  | No     |
| C26 | 3 (8)   | 43 (44) | 46      | 29 (30) | 41 (42) | 44      | No     | No  | Almost |
| C30 | 12 (36) | 44      | 46      | 28 (30) | 41 (42) | 44      | No     | No  | Almost |
| C25 | 2       | 27 (36) | 47      | 28 (31) | 41 (42) | 46      | Yes    | Yes | Yes    |
| C1  | 4       | 40      | 42 (43) | 28 (32) | 40      | 41      | Yes    | Yes | Yes    |
| C2  | 1 (2)   | 38      | 43      | 32 (34) | 40      | 44      | No     | Yes | Yes    |



**Table S6.** List of endemic Malagasy clades and their recovered stem and crown ages using the ACR approach (with Multidivtime software), as well as non-Malagasy clades for which an out-of-Madagascar dispersal is assumed. For node numbers, see Figure S2.

| Clade number | Number of species | Taxonomic name                                | Description                                              | Distribution of sister group | Node number -stem | Stem-age (mya) | Stem age in literature (mya) | Reference | Percent difference to literature | Node number - crown | Crown-age (mya) | Crown / Stem age ratio (percent) | Stem minus Crown age |
|--------------|-------------------|-----------------------------------------------|----------------------------------------------------------|------------------------------|-------------------|----------------|------------------------------|-----------|----------------------------------|---------------------|-----------------|----------------------------------|----------------------|
| 1            | 26                | Bedotiidae                                    | Bedotiid fishes                                          | Asia                         | 188               | 41.9           | n.a.                         |           | n.a.                             | n.a.                | n.a.            | n.a.                             | n.a.                 |
| 2            | 6                 | Aplocheilidae                                 | Malagasy species of <i>Pachypanchax</i>                  | Asia                         | 189               | 40.6           | n.a.                         |           | n.a.                             | n.a.                | n.a.            | n.a.                             | n.a.                 |
| 3            | 33                | Cichlidae                                     | Malagasy clade of cichlid fishes                         | Africa                       | 198               | 58.1           | 96                           | S27       | 40% younger                      | n.a.                | n.a.            | n.a.                             | n.a.                 |
| 4            | 266               | Mantellidae                                   | Mantellid frogs                                          | Asia                         | 232               | 75.7           | 61                           | S42       | 20% older                        | 231                 | 51.2            | 67.6                             | 24.5                 |
| 5            | 95                | Microhylidae: Scaphiophryninae and Cophylinae | Scaphiophrynine + Cophylinae frogs                       | Asia/Africa                  | 226               | 77.0           | 66                           | S42       | 14% older                        | 222                 | 66.9            | 86.9                             | 10.1                 |
| 6            | 3                 | Microhylidae: Dyscophinae                     | Dyscophine frogs                                         | Asia                         | 224               | 61.5           | 55                           | S42       | 11% older                        | 223                 | 22.8            | 37.1                             | 38.7                 |
| 7            | 10                | Hyperoliidae                                  | Malagasy hyperoliid frogs ( <i>Heterixalus</i> )         | Africa                       | 221               | 57.1           | 25                           | S43       | 56% older                        | 219                 | 25.0            | 43.8                             | 32.1                 |
| 8            | 1                 | Ptychadenidae                                 | Malagasy grass frog ( <i>Ptychadena mascareniensis</i> ) | Africa                       | 228               | 7.8            | n.a.                         |           | n.a.                             | 227                 | 3.4             | 43.6                             | 4.4                  |
| 9            | 1                 | Podocnemididae                                | Rere turtle ( <i>Erymnochelys</i> )                      | SouthAmerica/Africa          | 250               | 111.6          | 76                           | S34       | 32% older                        | n.a.                | n.a.            | n.a.                             | n.a.                 |
| 10           | 4                 | Testudinidae                                  | Malagasy genera of land tortoises                        | Africa                       | 248               | 78.5           | n.a.                         |           | n.a.                             | 247                 | 42.6            | 54.3                             | 35.9                 |
| 11           | 1                 | Crocodylidae                                  | Malagasy populations of Nile crocodile                   | Africa                       | 244               | 5.4            | n.a.                         |           | n.a.                             | n.a.                | n.a.            | n.a.                             | n.a.                 |
| 12           | 1                 | Xenotyphlopidae                               | Xenotyphlopoid blindsnakes                               | Africa/Asia                  | 288               | 60.7           | 97                           | S44       | 37% younger                      | n.a.                | n.a.            | n.a.                             | n.a.                 |
| 13           | 15                | Typhlopidae                                   | Malagasy clade of typhlopoid blindsnakes                 | Africa/Asia                  | 286               | 53.7           | ca. 65                       | S44       | 17% younger                      | 285                 | 48.0            | 89.4                             | 5.7                  |
| 14           | 4                 | Boidae                                        | Malagasy genera of giant snakes                          | Africa                       | 299               | 60.8           | 77                           | S34       | 21% younger                      | 298                 | 12.5            | 20.6                             | 48.3                 |
| 15           | 80                | Lamprophiidae: Pseudoxyrhophiinae             | Pseudoxyrhophiine snakes                                 | Africa                       | 295               | 23.8           | 31                           | S45       | 23% younger                      | 294                 | 20.8            | 87.4                             | 3.0                  |
| 16           | 1                 | Lamprophiidae: Psammophiinae                  | Malagasy psammophiine snake ( <i>Mimophis</i> )          | Africa                       | 291               | 18.7           | 13                           | S45       | 30% older                        | n.a.                | n.a.            | n.a.                             | n.a.                 |
| 17           | 9                 | Opluridae                                     | Malagasy iguanas                                         | SouthAmerica                 | 313               | 90.0           | 90                           | S34       | 0% older/younger                 | 312                 | 31.5            | 35.0                             | 58.5                 |
| 18           | 94                | Chamaeleonidae                                | Chameleons                                               | Africa                       | 309               | 53.7           | ca. 60                       | S46       | 10% younger                      | 308                 | 47.7            | 88.8                             | 6.0                  |
| 19           | 19                | Gerrhosauridae                                | Malagasy gerrhosaurid lizards                            | Africa                       | 326               | 60.5           | n.a.                         |           | n.a.                             | 325                 | 35.0            | 57.9                             | 25.5                 |

|    |    |                                           |                                                               |             |     |      |         |          |                 |      |      |      |      |
|----|----|-------------------------------------------|---------------------------------------------------------------|-------------|-----|------|---------|----------|-----------------|------|------|------|------|
| 20 | 13 | Scincidae: <i>Trachylepis</i>             | Malagasy species of <i>Trachylepis</i> skinks                 | Africa      | 319 | 19.1 | n.a.    | n.a.     | 318             | 16.1 | 84.3 | 3.0  |      |
| 21 | 67 | Scincidae: Scincinae                      | Malagasy lineages of scincine skinks                          | Africa      | 322 | 65.1 | n.a.    | n.a.     | 321             | 47.0 | 72.2 | 18.1 |      |
| 22 | 34 | Gekkonidae: Phelsuma                      | <i>Phelsuma</i> day geckos                                    | Africa      | 278 | 62.3 | n.a.    | n.a.     | 277             | 29.7 | 47.7 | 32.6 |      |
| 23 | 24 | Gekkonidae: <i>Lygodactylus</i>           | <i>Lygodactylus</i> day geckos                                | Africa      | 278 | 62.3 | n.a.    | n.a.     | 271             | 38.4 | 61.6 | 23.9 |      |
| 24 | 4  | Gekkonidae: <i>Blaesodactylus</i>         | <i>Blaesodactylus</i> geckos                                  | Africa      | 264 | 42.3 | n.a.    | n.a.     | n.a.            | n.a. | n.a. | n.a. |      |
| 25 | 19 | Gekkonidae: <i>Paroedura</i>              | <i>Paroedura</i> geckos                                       | Africa      | 265 | 57.0 | n.a.    | n.a.     | n.a.            | n.a. | n.a. | n.a. |      |
| 26 | 19 | Gekkonidae: <i>Uroplatus</i>              | <i>Uroplatus</i> leaf-tail geckos                             | Africa      | 261 | 50.7 | n.a.    | n.a.     | n.a.            | n.a. | n.a. | n.a. |      |
| 27 | 1  | Gekkonidae: <i>Hemidactylus</i>           | Malagasy populations of house gecko ( <i>H. mercatorius</i> ) | Africa      | 259 | 4.1  | n.a.    | n.a.     | n.a.            | n.a. | n.a. | n.a. |      |
| 28 | 96 | Strepsirhini                              | Lemurs                                                        | Africa/Asia | 348 | 71.2 | 60      | S2       | 16% older       | 347  | 63.7 | 89.5 | 7.5  |
| 29 | 29 | Tenrecidae                                | Tenrecs                                                       | Africa      | 335 | 59.7 | 42 / 47 | S2 / S47 | 21% older (BMC) | 334  | 27.1 | 45.4 | 32.6 |
| 30 | 24 | Muridae: Nesomyinae                       | Endemic Malagasy subfamily of rodents                         | Africa      | 341 | 27.9 | 24      | S2       | 14% older       | 340  | 25.0 | 89.6 | 2.9  |
| 31 | 9  | Eupleridae                                | Endemic Malagasy family of carnivores                         | Africa      | 356 | 25.8 | 26      | S2       | 0%              | 355  | 18.2 | 70.5 | 7.6  |
|    |    | Cichlidae: Dispersal to India/Asia        | <i>Etilopus</i>                                               | Asia        | 197 | 35.7 |         |          |                 |      |      |      |      |
|    |    | Hyperoliidae: Dispersal to Seychelles     | <i>Tachycnemis</i>                                            | Seychelles  | 220 | 28.1 |         |          |                 |      |      |      |      |
|    |    | <i>Phelsuma</i> : Dispersal to Comoros 1  | Comoran <i>Phelsuma</i> species                               | Comoros     | 273 | 11.1 |         |          |                 |      |      |      |      |
|    |    | <i>Phelsuma</i> : Dispersal to Comoros 2  | Comoran <i>Phelsuma</i> species                               | Comoros     | 272 | 3.4  |         |          |                 |      |      |      |      |
|    |    | <i>Phelsuma</i> : Dispersal to Mascarenes | Mascarene radiation of <i>Phelsuma</i>                        | Mascarenes  | 276 | 21.5 |         |          |                 |      |      |      |      |
|    |    | <i>Lygodactylus</i> : Dispersal to Africa | African <i>Lygodactylus</i> day geckos                        | Africa      | 269 | 28.1 |         |          |                 |      |      |      |      |
|    |    | <i>Paroedura</i> : Dispersal to Comoros   | <i>Paroedura sanctijohannis</i>                               | Comoros     | 263 | 6.6  |         |          |                 |      |      |      |      |
|    |    | Chameleons: Dispersal to Comoros          | Comoran species of <i>Furcifer</i>                            | Africa      | 306 | 33.3 |         |          |                 |      |      |      |      |
|    |    | <i>Boophis</i> : Dispersal to Comoros     | <i>Boophis</i> sp. "Comoros"                                  | Comoros     | 292 | 6.8  |         |          |                 |      |      |      |      |
|    |    | <i>Blommersia</i> : Dispersal to Comoros  | <i>Blommersia</i> sp. "Comoros"                               | Comoros     | 229 | 10.2 |         |          |                 |      |      |      |      |
|    |    | <i>Lycodryas</i> : Dispersal to Comoros   | <i>Lycodryas sanctijohannis</i>                               | Comoros     | 230 | 11.2 |         |          |                 |      |      |      |      |

**Table S7.** List of endemic Malagasy clades, their ecological, physiological and behavioral traits used as covariables to analyse the influence of clade age on species richness, and their occurrence “1” predominantly in rainforest (>75% of species), “2” in similar proportions in rainforest and dry forest / open areas, or 3 predominantly (>75% of species) in dry forest or in open areas within humid or subhumid regions.

| Clade number | Taxonomic name                                | Aquatic or water-dependent 1 / non water-dependent2 | Maximum Body Mass (cm SVL) | Ectotherm 1, Endotherm 2 | Trophic position 1 herbivorous, 2 omnivorous/insectivorous, 3 carnivores feeding mainly on vertebrates | Internal fertilization 1 no, 2 yes | Parental care in numerous or all species 1 no, 2 yes | Generation time (years; estimated) | Rainforest / dry forest occurrence |
|--------------|-----------------------------------------------|-----------------------------------------------------|----------------------------|--------------------------|--------------------------------------------------------------------------------------------------------|------------------------------------|------------------------------------------------------|------------------------------------|------------------------------------|
| 1            | Bedotiidae                                    | 1                                                   | 20                         | 1                        | 2                                                                                                      | 1                                  | 1                                                    | 1                                  | 1                                  |
| 2            | Aplocheilidae                                 | 1                                                   | 8                          | 1                        | 2                                                                                                      | 1                                  | 1                                                    | 1                                  | 2                                  |
| 3            | Cichlidae                                     | 1                                                   | 40                         | 1                        | 2                                                                                                      | 1                                  | 2                                                    | 2                                  | 2                                  |
| 4            | Mantellidae                                   | 1                                                   | 12                         | 1                        | 2                                                                                                      | 1                                  | 2                                                    | 1                                  | 1                                  |
| 5            | Microhylidae: Scaphiophryninae and Cophylinae | 1                                                   | 6                          | 1                        | 2                                                                                                      | 1                                  | 2                                                    | 1                                  | 1                                  |
| 6            | Microhylidae: Dyscophinae                     | 1                                                   | 10.5                       | 1                        | 2                                                                                                      | 1                                  | 1                                                    | 2                                  | 2                                  |
| 7            | Hyperoliidae                                  | 1                                                   | 4                          | 1                        | 2                                                                                                      | 1                                  | 1                                                    | 1                                  | 2                                  |
| 8            | Ptychadenidae                                 | 1                                                   | 5.5                        | 1                        | 2                                                                                                      | 1                                  | 1                                                    | 1                                  | 3                                  |
| 9            | Podocnemididae                                | 1                                                   | 41                         | 1                        | 1                                                                                                      | 2                                  | 1                                                    | 20                                 | 3                                  |
| 10           | Testudinidae                                  | 2                                                   | 45                         | 1                        | 2                                                                                                      | 2                                  | 1                                                    | 10                                 | 3                                  |
| 11           | Crocodylidae                                  | 1                                                   | 600                        | 1                        | 3                                                                                                      | 2                                  | 2                                                    | 10                                 | 2                                  |
| 12           | Xenotyphlopidae                               | 2                                                   | 26.3                       | 1                        | 2                                                                                                      | 2                                  | 1                                                    | 1                                  | 3                                  |
| 13           | Typhlopidae                                   | 2                                                   | 60                         | 1                        | 2                                                                                                      | 2                                  | 1                                                    | 1                                  | 2                                  |
| 14           | Boidae                                        | 2                                                   | 320                        | 1                        | 3                                                                                                      | 2                                  | 1                                                    | 3                                  | 2                                  |
| 15           | Lamprophiidae: Pseudoxyrhophiinae             | 2                                                   | 170                        | 1                        | 3                                                                                                      | 2                                  | 1                                                    | 2                                  | 1                                  |
| 16           | Lamprophiidae: Psammophiinae                  | 2                                                   | 100                        | 1                        | 3                                                                                                      | 2                                  | 1                                                    | 2                                  | 3                                  |
| 17           | Opluridae                                     | 2                                                   | 39                         | 1                        | 2                                                                                                      | 2                                  | 1                                                    | 2                                  | 3                                  |
| 18           | Chamaeleonidae                                | 2                                                   | 29.5                       | 1                        | 2                                                                                                      | 2                                  | 1                                                    | 1                                  | 1                                  |
| 19           | Gerrhosauridae                                | 2                                                   | 24.5                       | 1                        | 2                                                                                                      | 2                                  | 1                                                    | 2                                  | 2                                  |
| 20           | Scincidae: <i>Trachylepis</i>                 | 2                                                   | 11.2                       | 1                        | 2                                                                                                      | 2                                  | 1                                                    | 1                                  | 2                                  |
| 21           | Scincidae: Scincinae                          | 2                                                   | 22.6                       | 1                        | 2                                                                                                      | 2                                  | 1                                                    | 1                                  | 2                                  |
| 22           | Gekkonidae: Phelsuma                          | 2                                                   | 13.5                       | 1                        | 2                                                                                                      | 2                                  | 1                                                    | 1                                  | 1                                  |

|    |                                      |   |      |   |   |   |   |   |   |
|----|--------------------------------------|---|------|---|---|---|---|---|---|
| 23 | Gekkonidae:<br><i>Lygodactylus</i>   | 2 | 3.8  | 1 | 2 | 2 | 1 | 1 | 2 |
| 24 | Gekkonidae:<br><i>Blaesodactylus</i> | 2 | 13.2 | 1 | 2 | 2 | 1 | 2 | 2 |
| 25 | Gekkonidae: <i>Paroedura</i>         | 2 | 10.7 | 1 | 2 | 2 | 1 | 1 | 3 |
| 26 | Gekkonidae: <i>Uroplatus</i>         | 2 | 19.8 | 1 | 2 | 2 | 1 | 2 | 1 |
| 27 | Gekkonidae:<br><i>Hemidactylus</i>   | 2 | 5.6  | 1 | 2 | 2 | 1 | 1 | 2 |
| 28 | Strepsirhini                         | 2 | 72   | 2 | 2 | 2 | 2 | 2 | 2 |
| 29 | Tenrecidae                           | 2 | 39   | 2 | 2 | 2 | 2 | 1 | 1 |
| 30 | Muridae: Nesomyinae                  | 2 | 35   | 2 | 2 | 2 | 2 | 1 | 1 |
| 31 | Eupleridae                           | 2 | 80   | 2 | 3 | 2 | 2 | 2 | 2 |

**Table S8.** Significance of different factors for clade species richness. All factors used for ANCOVA are listed. Analysis included either clade age estimates retrieved from ACR or ICR analyses. If marked with „deleted“, the respective factor was deleted during model simplification based on AIC. The lower part of the table shows the results of Tukey's honest significance test on the variable "rainforest occurrence" in the minimum adequate model. See Table 7 for categories and original data of all factors.

|                                     | <b>ACR</b>                                                 | <b>ICR</b>                                                 |
|-------------------------------------|------------------------------------------------------------|------------------------------------------------------------|
| model                               | R <sup>2</sup> =0.74; F <sub>7,23</sub> =9.32,<br>P=<0.001 | R <sup>2</sup> =0.69; F <sub>7,23</sub> =7.19,<br>P=<0.001 |
| clade age                           | <b>0.002</b>                                               | <b>0.019</b>                                               |
| rainforest occurrence               | <b>&lt;0.001</b>                                           | <b>&lt;0.001</b>                                           |
| body size                           | deleted                                                    | deleted                                                    |
| age to maturity                     | deleted                                                    | deleted                                                    |
| endothermy                          | 0.211                                                      | 0.124                                                      |
| trophic position                    | deleted                                                    | deleted                                                    |
| internal vs. external fertilization | <b>0.013</b>                                               | 0.069                                                      |
| parental care                       | <b>0.041</b>                                               | 0.092                                                      |
| aquatic vs. terrestrial habitat     | <b>0.003</b>                                               | <b>0.008</b>                                               |

  

|       | <b>ACR</b>                                          | <b>ICR</b>                                          |
|-------|-----------------------------------------------------|-----------------------------------------------------|
| level | P value after adjustment for<br>multiple comparison | P value after adjustment for multiple<br>comparison |
| 2-1   | <b>0.002</b>                                        | <b>0.038</b>                                        |
| 3-1   | <b>&lt;0.001</b>                                    | <b>&lt;0.001</b>                                    |
| 3-2   | <b>0.004</b>                                        | <b>0.017</b>                                        |

**Appendix.** Complete list of species and confirmed candidate species, CCS (S48), of native non-flying terrestrial and freshwater vertebrates of Madagascar. Species are listed separately for endemic clades, and brief discussions are included of the monophyly, characteristics and sister groups of the respective clades. Note that the clades might contain additional species; only those clade members occurring in Madagascar are listed. Clades not included in the list and/or in the analysis are: *Cryptoblepharus* skinks, *Pelusios* and *Pelomedusa* turtles (possibly introduced to Madagascar, therefore included in the timetree but not in further analyses), *Geckolepis*, *Matoatoa* and *Paragehyra* geckos, *Pantanodon* fishes, and numerous other fishes occurring in freshwater but being non-primary freshwater clades. Taxonomic authority is given for all nominal species reptiles and amphibians (not compiled for fishes and mammals). Names of candidate species set in quotation marks and not in italics are used as conditional names in the sense of the International Code of Zoological Nomenclature. Undescribed candidate species are given either with the name to which they were referred in the mentioned publications, or with the field or museum number of a voucher specimen that can serve for future reference (DRV, David R. Vieites field number; FAZC, Franco Andreone Zoological Collection; FGZC, Frank Glaw Zoological Collection; MRSN, Museo Regionale di Scienze Naturali di Torino; ZCMV; Zoological Collection Miguel Vences; ZMA, Zoological Museum Amsterdam; ZSM, Zoologische Staatssammlung München).

### **Clade 1: Bedotiidae (26 species)**

**Clade description:** The Bedotiidae are an endemic clade populating lotic waters on Madagascar's east coast. Their monophyly and sister-group relationship to the Australasian rainbowfishes (Melanotaeniidae) has been assessed by analysis of an extensive molecular data set (S49).

*Bedotia geayi*; *Bedotia madagascariensis*; *Bedotia longianalis*; *Bedotia marojejy*; *Bedotia masoala*; *Bedotia tricolor*; *Bedotia vondrozo*; *Bedotia* sp. "bemarivo"; *Bedotia* sp. "betampona"; *Bedotia* sp. "garassa"; *Bedotia* sp. "lazana"; *Bedotia* sp. "mahanara"; *Bedotia* sp. "manombo"; *Bedotia* sp. "marosivy"; *Bedotia* sp. "nosivolo"; *Bedotia* sp. "ranomafana"; *Bedotia* sp. "sambava"; *Rheocles alaotrensis*; *Rheocles derhami*; *Rheocles lateralis*; *Rheocles pellegrini*; *Rheocles sikorae*; *Rheocles wrightae*; *Rheocles* sp. "ambatovy"; *Rheocles* sp. "andapa"; *Rheocles* sp. "rianila"

### **Clade 2: Aplocheilidae (6 species)**

**Clade description:** The Aplocheilidae are small killifish containing the South Asian genus *Aplocheilus*, and the genus *Pachypanchax* that occurs in western and northern Madagascar and includes one species from the Seychelles (not studied in our phylogeny). Sister-group relationships among these two genera have been assessed by molecular data (S50).

*Pachypanchax sakaramyi*; *Pachypanchax omalonotus*; *Pachypanchax arnaulti*; *Pachypanchax patriciae*; *Pachypanchax sparksorum*; *Pachypanchax varatraza*

### **Clade 3: Cichlidae (33 species)**

**Clade description:** Cichlid fishes are a species-rich monophyletic group of rather typical western Gondwana distribution, with numerous species in the Neotropics, Africa, and Madagascar, and one species-poor genus (*Etroplus*) in South Asia. Molecular phylogenetic reconstructions to date (e.g., S51, S52; and the tree reconstructed herein)

place the cichlids from Madagascar and India paraphyletically at the basis of the tree: *Etroplus* (India) and *Paretroplus* (Africa) form a monophyletic group, and the remaining cichlid genera from Madagascar (ptychochromines) form a second basal clade among the Cichlidae. Given this basal position of the Madagascar cichlids we here conservatively reconstructed the basal node of all cichlids as representing the origin of the taxa from Madagascar, and assume dispersal to India of the ancestors of *Etroplus*.

*Katria katria*; *Oxylapia polli*; *Paratilapia polleni*; *Paratilapia bleekeri*; *Paratilapia* sp. "all black"; *Paratilapia* sp. "fony"; *Paratilapia* sp. "ihotry"; *Ptychochromis grandidieri*; *Ptychochromis oligacanthus*; *Ptychochromis* sp. "black saroy"; *Ptychochromis* sp. "green garaka"; *Ptychochromis* sp. "inornatus"; *Ptychochromis* sp. "kotro/onilahy"; *Ptychochromis* sp. "mipentina"; *Ptychochromis* sp. "nossibeensis"; *Ptychochromoides betsileanus*; *Ptychochromoides vondrozo*; *Ptychochromoides* sp. "itasy"; *Paretroplus damii*; *Paretroplus kieneri*; *Paretroplus maculatus*; *Paretroplus maromandia*; *Paretroplus menarambo*; *Paretroplus nourissati*; *Paretroplus petiti*; *Paretroplus polyactis*; *Paretroplus* sp. "ankarafantsika"; *Paretroplus* sp. "bambabe"; *Paretroplus* sp. "dridrimena"; *Paretroplus* sp. "lac parinadrina"; *Paretroplus* sp. "sofia"; *Paretroplus* sp. "tsimoly"; *Paretroplus* sp. "ventitry"

### **Clade 4: Mantellidae (266 species)**

**Clade description:** The Mantellidae are a species rich clade of frogs restricted to Madagascar and (with two undescribed endemic species) the island of Mayotte, Comoros. Mantellids are deeply phylogenetically nested within Asian clades of the cosmopolitan ranoid frogs, and are sister to the Asian Rhacophoridae (S42, S43, S53, S54). This indicates an origin of the Mantellidae from Asia/India.

*Aglyptodactylus laticeps* Glaw, Vences & Böhme; *Aglyptodactylus madagascariensis* (Duméril); *Aglyptodactylus securifer* Glaw, Vences & Böhme;

*Aglyptodactylus* sp. 2 CCS (S48); *Aglyptodactylus* sp. 3 CCS (S48); *Blommersia angolafa* Andreone, Rosa, Noel, Crottini, Vences & Raxworthy; *Blommersia blommersae* (Guibé); *Blommersia dejongi* Vences, Köhler, Pabijan & Glaw; *Blommersia domerguei* (Guibé); *Blommersia galani* Vences, Köhler, Pabijan & Glaw; *Blommersia grandisonae* (Guibé); *Blommersia kely* (Glaw & Vences); *Blommersia sarotra* (Glaw & Vences); *Blommersia* sp. 11 CCS (S48); *Blommersia* sp. 2 CCS (S48); *Blommersia* sp. 5 CCS (S48); *Blommersia* sp. 7 CCS (S48); *Blommersia* sp. 8 CCS (S48); *Blommersia* sp. 9 CCS (S48); *Blommersia wittei* (Guibé); *Boehmantis microtympanum* (Angel); *Boophis albilabris* (Boulenger); *Boophis albigularis* Glaw & Thiesmeier; *Boophis andohahela* Andreone, Nincheri & Piazza; *Boophis andrangoloaka* (Ahl); *Boophis andreonei* Glaw & Vences; *Boophis anjanaharibeensis* Andreone; *Boophis ankaratra* Andreone; *Boophis arcanus* Glaw, Köhler, De la Riva, Vieites & Vences; *Boophis axelmeyeri* Vences, Andreone & Vieites; *Boophis baetkei* Köhler, Glaw & Vences; *Boophis blommersae* Glaw & Vences; *Boophis boehmei* Glaw & Vences; *Boophis bottae* Vences & Glaw; *Boophis brachychir* (Boettger); *Boophis burgeri* Glaw & Vences; *Boophis calcaratus* Vallan, Vences & Glaw; *Boophis doulioti* (Angel); *Boophis elenae* Andreone; *Boophis englaenderi* Glaw & Vences; *Boophis entingae* Glaw, Köhler, De la Riva, Vieites & Vences; *Boophis erythrodactylus* (Guibé); *Boophis feonnyala* Glaw, Vences, Andreone & Vallan; *Boophis goudotii* Tschudi; *Boophis guibei* (McCarthy); *Boophis haematopus* Glaw, Vences, Andreone & Vallan; *Boophis haingana* Glaw, Köhler, De la Riva, Vieites & Vences; *Boophis idae* (Steindachner); *Boophis jaegeri* Glaw & Vences; *Boophis laurenti* Guibé; *Boophis liami* Vallan, Vences & Glaw; *Boophis lichenoides* Vallan, Glaw, Andreone & Cadle; *Boophis liliana* Köhler, Glaw & Vences; *Boophis luciae* Glaw, Köhler, De la Riva, Vieites & Vences; *Boophis luteus* (Boulenger); *Boophis madagascariensis* (Peters); *Boophis majori* (Boulenger); *Boophis mandraka* Blommers-Schlösser; *Boophis marojezensis* Glaw & Vences; *Boophis miadana* Glaw, Köhler, De la Riva, Vieites & Vences; *Boophis microtympanum* (Boettger); *Boophis miniatus* (Mocquard); *Boophis obscurus* Boettger; *Boophis occidentalis* Glaw & Vences; *Boophis opisthodon* (Boulenger); *Boophis pauliani* (Guibé); *Boophis periegetes* Cadle; *Boophis picturatus* Glaw, Vences, Andreone & Vallan; *Boophis piperatus* Glaw, Köhler, De la Riva, Vieites & Vences; *Boophis praedictus* Glaw, Köhler, De la Riva, Vieites & Vences; *Boophis pyrhus* Glaw, Vences, Andreone & Vallan; *Boophis quasiboehmei* Vences, Köhler, Crottini & Glaw; *Boophis rapiodes* (Ahl); *Boophis reticulatus* Blommers-Schlösser; *Boophis rhodoscelis* (Boulenger); *Boophis roseipalmatus* Glaw, Köhler, De la Riva, Vieites & Vences;

*Boophis rufioculis* Glaw & Vences; *Boophis sambirano* Vences & Glaw; *Boophis sandrae* Glaw, Köhler, De la Riva, Vieites & Vences; *Boophis schuboeae* Glaw & Vences; *Boophis septentrionalis* Glaw & Vences; *Boophis sibilans* Glaw & Thiesmeier; *Boophis solomaso* Vallan, Vences & Glaw; *Boophis* sp. 15 CCS (S48); *Boophis* sp. 18 CCS (S48); *Boophis* sp. 28 CCS (S48); *Boophis* sp. 33 CCS (S48); *Boophis* sp. 35 CCS (S48); *Boophis* sp. 8 CCS (S48); *Boophis spinophis* Glaw, Köhler, De la Riva, Vieites & Vences; *Boophis tampoka* Köhler, Glaw & Vences; *Boophis tasymana* Vences & Glaw; *Boophis tephraeomystax* (Duméril); *Boophis tsilomaro* Vences, Andreone, Glos & Glaw; *Boophis ulfturni* Wollenberg, Andreone, Glaw & Vences; *Boophis viridis* Blommers-Schlösser; *Boophis vittatus* Glaw, Vences, Andreone & Vallan; *Boophis williamsi* (Guibé); *Boophis xerophilus* Glaw & Vences; *Gephyromantis ambohitra* (Vences & Glaw); *Gephyromantis asper* (Boulenger); *Gephyromantis atsingy* Crottini, Glaw, Casiraghi, Jenkins, Mercurio, Randrianantoandro, Randrianirina & Andreone; *Gephyromantis azzurrae* Mercurio & Andreone; *Gephyromantis blanci* Guibé; *Gephyromantis boulengeri* Methuen; *Gephyromantis cornutus* (Glaw & Vences); *Gephyromantis corvus* (Glaw & Vences); *Gephyromantis decaryi* Angel; *Gephyromantis eiselti* Guibé; *Gephyromantis enki* (Glaw & Vences); *Gephyromantis granulatus* (Boettger); *Gephyromantis horridus* (Boettger); *Gephyromantis klemmeri* Guibé; *Gephyromantis leucocephalus* Angel; *Gephyromantis leucomaculatus* (Guibé); *Gephyromantis luteus* (Methuen & Hewitt); *Gephyromantis malagasius* (Methuen & Hewitt); *Gephyromantis moseri* (Glaw & Vences); *Gephyromantis plicifer* (Boulenger); *Gephyromantis pseudoasper* (Guibé); *Gephyromantis redimitus* (Boulenger); *Gephyromantis rivicola* (Vences, Glaw & Andreone); *Gephyromantis runewsweeki* Vences & De la Riva; *Gephyromantis salegy* (Andreone, Aprea, Vences & Odierna); *Gephyromantis schilfi* (Glaw & Vences); *Gephyromantis sculpturatus* (Ahl); *Gephyromantis silvanus* (Vences, Glaw & Andreone); *Gephyromantis* sp. 1 CCS (S48); *Gephyromantis* sp. 11 CCS (S48); *Gephyromantis* sp. 13 CCS (S48); *Gephyromantis* sp. 17 CCS (S48); *Gephyromantis* sp. 22 CCS (S48); *Gephyromantis* sp. 24 CCS (S48); *Gephyromantis* sp. 25 CCS (S48); *Gephyromantis* sp. 26 CCS (S48); *Gephyromantis* sp. 27 CCS (S48); *Gephyromantis* sp. 4 CCS (S48); *Gephyromantis* sp. 5 CCS (S48); *Gephyromantis* sp. 6 CCS (S48); *Gephyromantis* sp. 7 CCS (S48); *Gephyromantis* sp. 8 CCS (S48); *Gephyromantis* sp. 9 CCS (S48); *Gephyromantis spinifer* (Blommers-Schlösser & Blanc); *Gephyromantis striatus* (Vences, Glaw, Andreone, Jesu & Schimmenti); *Gephyromantis tandroka* (Glaw & Vences); *Gephyromantis thelenae* (Glaw & Vences); *Gephyromantis*

*tschenki* (Glaw & Vences); *Gephyromantis ventrimaculatus* (Angel); *Gephyromantis webbi* (Grandison); *Gephyromantis zavona* (Vences, Andreone, Glaw & Randrianirina); *Guibemantis albolineatus* (Blommers-Schlösser & Blanc); *Guibemantis bicalcaratus* (Boettger); *Guibemantis depressiceps* (Boulenger); *Guibemantis flavobrunneus* (Blommers-Schlösser); *Guibemantis kathrinae* (Glaw, Vences & Gossmann); *Guibemantis liber* (Peracca); *Guibemantis pulcher* (Boulenger); *Guibemantis punctatus* (Blommers-Schlösser); *Guibemantis* sp. 10 CCS (S48); *Guibemantis* sp. 14 CCS (S48); *Guibemantis* sp. 19 CCS (S48); *Guibemantis* sp. 20 CCS (S48); *Guibemantis* sp. 3 CCS (S48); *Guibemantis* sp. 5 CCS (S48); *Guibemantis* sp. 6 CCS (S48); *Guibemantis* sp. 9 CCS (S48); *Guibemantis timidus* (Vences & Glaw); *Guibemantis tornieri* (Ahl); *Laliostoma labrosum* (Cope); *Mantella aurantiaca* Mocquard; *Mantella baroni* Boulenger; *Mantella bernhardi* Vences, Glaw, Peyrieras, Böhme & Busse; *Mantella betsileo* (Grandidier); *Mantella cowani* Boulenger; *Mantella crocea* Pintak & Böhme; *Mantella ebenau* (Boettger); *Mantella expectata* Busse & Böhme; *Mantella haraldmeieri* Busse; *Mantella laevigata* Methuen & Hewitt; *Mantella madagascariensis* (Grandidier); *Mantella manery* Vences, Glaw & Böhme; *Mantella milotympanum* Staniszewski; *Mantella nigricans* Guibé; *Mantella pulchra* Parker; *Mantella* sp. 1 CCS (S48); *Mantella viridis* Pintak & Böhme; *Mantidactylus aerumnalis* (Peracca); *Mantidactylus albofrenatus* (Müller); *Mantidactylus alutus* (Peracca); *Mantidactylus ambohimitombi* Boulenger; *Mantidactylus ambreensis* Mocquard; *Mantidactylus argenteus* Methuen; *Mantidactylus bellyi* Mocquard; *Mantidactylus betsileanus* (Boulenger); *Mantidactylus biporus* (Boulenger); *Mantidactylus bourgati* Guibé; *Mantidactylus brevipalmatus* Ahl; *Mantidactylus charlotteae* Vences & Glaw; *Mantidactylus cowanii* (Boulenger); *Mantidactylus curtus* (Boulenger); *Mantidactylus delormei* Angel; *Mantidactylus femoralis* (Boulenger); *Mantidactylus grandidieri* Mocquard; *Mantidactylus guttulatus* (Boulenger); *Mantidactylus lugubris* (Duméril); *Mantidactylus madecassus* (Millot & Guibé); *Mantidactylus majori* Boulenger; *Mantidactylus melanopleura* (Mocquard); *Mantidactylus mocquardi* Angel; *Mantidactylus noralottae* Mercurio & Andreone; *Mantidactylus opiparis* (Peracca); *Mantidactylus pauliani* Guibé; *Mantidactylus* sp. 1 CCS (S48); *Mantidactylus* sp. 13 CCS (S48); *Mantidactylus* sp. 14 CCS (S48); *Mantidactylus* sp. 17 CCS (S48); *Mantidactylus* sp. 18 CCS (S48); *Mantidactylus* sp. 19 CCS (S48); *Mantidactylus* sp. 20 CCS (S48); *Mantidactylus* sp. 21 CCS (S48); *Mantidactylus* sp. 22 CCS (S48); *Mantidactylus* sp. 23 CCS (S48); *Mantidactylus* sp. 24 CCS (S48); *Mantidactylus* sp. 26 CCS (S48); *Mantidactylus* sp. 27 CCS (S48); *Mantidactylus* sp. 28 CCS (S48); *Mantidactylus* sp. 29 CCS (S48); *Mantidactylus* sp. 3 CCS (S48);

*Mantidactylus* sp. 30 CCS (S48); *Mantidactylus* sp. 32 CCS (S48); *Mantidactylus* sp. 33 CCS (S48); *Mantidactylus* sp. 35 CCS (S48); *Mantidactylus* sp. 36 CCS (S48); *Mantidactylus* sp. 40 CCS (S48); *Mantidactylus* sp. 41 CCS (S48); *Mantidactylus* sp. 44 CCS (S48); *Mantidactylus* sp. 45 CCS (S48); *Mantidactylus* sp. 46 CCS (S48); *Mantidactylus* sp. 47 CCS (S48); *Mantidactylus* sp. 48 CCS (S48); *Mantidactylus* sp. 49 CCS (S48); *Mantidactylus* sp. 52 CCS (S48); *Mantidactylus* sp. 57 CCS (S48); *Mantidactylus* sp. 59 CCS (S48); *Mantidactylus* sp. 7 CCS (S48); *Mantidactylus tricinctus* (Guibé); *Mantidactylus ulcerosus* (Boettger); *Mantidactylus zipperi* Vences & Glaw; *Mantidactylus zolitschka* Glaw & Vences; *Spinomantis aglavei* (Methuen & Hewitt); *Spinomantis bertini* (Guibé); *Spinomantis brunae* (Andreone, Glaw, Vences & Vallan); *Spinomantis elegans* (Guibé); *Spinomantis fimbriatus* (Glaw & Vences); *Spinomantis guibei* (Blommers-Schlösser); *Spinomantis massi* (Glaw & Vences); *Spinomantis microtis* (Guibé); *Spinomantis nussbaumi* Cramer, Rabibisoa & Raxworthy; *Spinomantis peraccae* (Boulenger); *Spinomantis phantasticus* (Glaw & Vences); *Spinomantis* sp. 5 CCS (S48); *Spinomantis* sp. 6 CCS (S48); *Spinomantis* sp. 8 CCS (S48); *Spinomantis tavaratra* Cramer, Rabibisoa & Raxworthy; *Tsingymantis antitra* Glaw, Hoegg & Vences; *Wakea madinika* (Vences, Andreone, Glaw & Mattioli)

#### **Clade 5: Microhylidae: Cophylinae + Scaphiophryninae (95 species)**

Clade description: The Microhylidae is a cosmopolitan group of largely unresolved basal relationships (S42, S53). Two endemic microhylid subfamilies from Madagascar, the Scaphiophryninae and Cophylinae, are reciprocally monophyletic and together form a clade (S47). The exact relationships of this clade to other microhylids are uncertain, and we therefore here consider they originated from either Asia or Africa. *Scaphiophryne boribory* Vences, Raxworthy, Nussbaum & Glaw; *Scaphiophryne brevis* (Boulenger); *Scaphiophryne calcarata* (Mocquard); *Scaphiophryne gottlebei* Busse & Böhme; *Scaphiophryne madagascariensis* (Boulenger); *Scaphiophryne marmorata* Boulenger; *Scaphiophryne menabensis* Glos, Glaw & Vences; *Scaphiophryne spinosa* Steindachner; *Paradoxophyla palmata* (Guibé); *Paradoxophyla tiarano* Andreone, Aprea, Odierna & Vences; *Anodonthyla boulengeri* Müller; *Anodonthyla emilei* Vences, Glaw, Köhler & Wollenberg; *Anodonthyla jeanbai* Vences, Glaw, Köhler & Wollenberg; *Anodonthyla montana* Angel; *Anodonthyla moramora* Glaw & Vences; *Anodonthyla nigrigularis* Glaw & Vences; *Anodonthyla pollicaris* (Boettger); *Anodonthyla rouxae* Guibé; *Anodonthyla theoi* Vences, Glaw, Köhler & Wollenberg; *Anodonthyla vallani* Vences, Glaw, Köhler & Wollenberg; *Anodonthyla*

*hutchisoni* Fenolio, Walvoord, Stout, Randrianirina & Andreone; *Cophyla berara* Vences, Andreone & Glaw; *Cophyla occultans* (Glaw & Vences); *Cophyla phyllodactyla* Boettger; *Madecassophryne truebae* Guibé; *Platypelis alticola* (Guibé); *Platypelis barbouri* Noble; *Platypelis cowani* Boulenger; *Platypelis grandis* (Boulenger); *Platypelis mavomavo* Andreone, Fenolio & Walvoord; *Platypelis milloti* Guibé; *Platypelis pollicaris* Boulenger; *Platypelis tetra* Andreone, Fenolio & Walvoord; *Platypelis tsaratananaensis* Guibé; *Platypelis tuberifera* (Methuen); *Plethodontohyla bipunctata* (Guibé); *Plethodontohyla brevipes* Boulenger; *Plethodontohyla fonetana* Glaw, Köhler, Bora, Rabibisoa, Ramilijaona & Vences; *Plethodontohyla guentheri* Glaw & Vences; *Plethodontohyla inguinalis* Boulenger; *Plethodontohyla mihanika* Vences, Raxworthy, Nussbaum & Glaw; *Plethodontohyla notosticta* (Günther); *Plethodontohyla ocellata* Noble & Parker; *Plethodontohyla tuberata* (Peters); *Rhombophryne alluaudi* (Mocquard); *Rhombophryne coronata* (Vences & Glaw); *Rhombophryne coudreaui* Angel; *Rhombophryne guentherpetersi* (Guibé); *Rhombophryne laevipes* (Mocquard); *Rhombophryne mangabensis* Glaw, Köhler & Vences; *Rhombophryne matavy* D'Cruze, Köhler, Vences & Glaw; *Rhombophryne minuta* (Guibé); *Rhombophryne serratopalpebrosa* (Guibé); *Rhombophryne testudo* Boettger; *Stumpffia be* Köhler, Vences, D'Cruze & Glaw; *Stumpffia gimmeli* Glaw & Vences; *Stumpffia grandis* Guibé; *Stumpffia hara* Köhler, Vences, D'Cruze & Glaw; *Stumpffia helenae* Vallan; *Stumpffia madagascariensis* Mocquard; *Stumpffia megsoni* Köhler, Vences, D'Cruze & Glaw; *Stumpffia psologlossa* Boettger; *Stumpffia pygmaea* Vences & Glaw; *Stumpffia roseifemoralis* Guibé; *Stumpffia staffordi* Köhler, Vences, D'Cruze & Glaw; *Stumpffia tetradactyla* Vences & Glaw; *Stumpffia tridactyla* Guibé; *Cophyla* sp. 1 "Ambre" (S80: p. 135, plate 5d); *Stumpffia* sp. 1 CCS (S48); *Stumpffia* sp. 6 CCS (S48); *Stumpffia* sp. 8 CCS (S48); *Stumpffia* sp. 9 CCS (S48); *Stumpffia* sp. 10 CCS (S48); *Stumpffia* sp. 11 CCS (S48); *Stumpffia* sp. 13 CCS (S48); *Stumpffia* sp. 14 CCS (S48); *Stumpffia* sp. 15 CCS (S48); *Stumpffia* sp. 16 CCS (S48); *Stumpffia* sp. 18 CCS (S48); *Stumpffia* sp. 19 CCS (S48); *Stumpffia* sp. "Tsaratanana" (ZCMV 12372); *Scaphiophryne* sp. 1 CCS (S48); *Scaphiophryne* sp. 2 "Marotondrano" CCS (S48); *Rhombophryne* sp. 2 CCS (S48); *Rhombophryne* sp. 6 CCS (S48); *Rhombophryne* sp. 8 CCS (S48); *Rhombophryne* sp. 9 CCS (S48); *Rhombophryne* sp. 10 "Tsaratanana" (ZCMV 12404); *Plethodontohyla* sp. 1 CCS (S48); *Plethodontohyla* sp. 3 CCS (S48); *Platypelis* sp. 4 CCS (S48); *Platypelis* sp. 6 CCS (S48); *Platypelis* sp. 7 CCS (S48); *Platypelis* sp. 8 CCS (S48); *Platypelis* sp. 10 CCS (S48)

#### **Clade 6: Microhylidae: Dyscophinae (3 species)**

Clade description: The dyscophines are the third endemic subfamily of microhylids in Madagascar. This species poor clade is clearly phylogenetically nested among various Asian microhylid clades (S42, S53) and an origin from Asia is therefore here assumed.

*Dyscophus insularis* Grandidier; *Dyscophus antongilii* (Grandidier); *Dyscophus guineti* Grandidier

#### **Clade 7: Hyperoliidae (10 species)**

Clade description: Hyperoliids are a clade of predominantly African distribution, with one genus (*Heterixalus*) in Madagascar and the monotypic *Tachycnemis* on the Seychelles. *Heterixalus* is closely related to *Tachycnemis*, and the monophyly of *Heterixalus* relative to *Tachycnemis* is not fully supported but also not contradicted by the molecular data available to date (S55). The *Heterixalus-Tachycnemis* clade is phylogenetically nested within hyperoliids and related to the African *Afrixalus* and *Hyperolius* (S43, S56).

*Heterixalus alboguttatus* (Boulenger); *Heterixalus andrakata* Glaw & Vences; *Heterixalus betsileo* (Grandidier); *Heterixalus boettgeri* (Mocquard); *Heterixalus carbonei* Vences, Glaw, Jesu & Schimmenti; *Heterixalus luteostriatus* (Andersson); *Heterixalus madagascariensis* (Duméril & Bibron); *Heterixalus punctatus* Glaw & Vences; *Heterixalus rutenbergi* (Boettger); *Heterixalus tricolor* (Boettger)

#### **Clade 8: Ptychadenidae (1 species)**

Clade description: The family Ptychadenidae is an exclusively African and Malagasy clade of ranoid frogs, until recently included in the family Ranidae but deeply divergent from other ranids. *Ptychadena* is a species-rich genus distributed over most of Africa. One species, *P. mascareniensis*, was described from the Mascarene islands and thought to occur on the Mascarenes, Seychelles, Madagascar, and Africa, and possibly being non-native in Madagascar. Molecular evidence suggests that the species is highly genetically diverse in Madagascar, with several deep clades, and thus must have colonized the island naturally and long before human colonization. From Madagascar it has been introduced to the Mascarenes and Seychelles. African populations thought to belong to this species are genetically highly divergent and probably belong to several distinct species (S57, S58).

*Ptychadena mascareniensis* (Duméril & Bibron)

#### **Clade 9: Podocnemididae (1 species)**

Clade description: The single podocnemidid turtle in Madagascar belongs to the monotypic, endemic genus *Erymnochelys* and is related to the South American genera *Podocnemis* and *Peltocephalus* (S34, S59). Although fossils attributed to the



Podocnemididae also have been recovered from Africa and Europe we here follow recent literature that assumed a land connection via Antarctica to explain their presence in Madagascar, and thus assume South America as their geographic origin. Note that we do not consider here other Malagasy terrapins (*Pelomedusa* and *Podocnemis*) of the Pelomedusidae as current data point to their possible introduction by humans from Africa. *Erymnochelys madagascariensis* (Grandidier)

#### **Clade 10: Testudinidae (4 species)**

Clade description: Of the five species of tortoises in Madagascar, one (*Kinyxis belliana*) is widespread in Africa and might be non-native in Madagascar. The other four species form a monophyletic clade endemic to the island. To this clade also belong the giant tortoises of the Seychelles, and based on an ancient DNA sequence probably also two extinct species of Madagascar giant tortoises. This clade in turn is sister to a clade containing various African genera of tortoises (S60, S61).

*Astrochelys (Angonoka) yniphora* (Vaillant); *Astrochelys (Astrochelys) radiata* (Shaw); *Pyxis arachnoides arachnoides* Bell; *Pyxis planicauda* (Grandidier)

#### **Clade 11: Crocodylidae (1 species)**

Clade description: Malagasy populations of the Nile crocodile are genetically differentiated and show some similarities to East African populations, based on a microsatellite analysis (S62).

*Crocodylus niloticus* Laurenti

#### **Clade 12: Xenotyphlopidae (1 species)**

Clade description: This recently described family of blindsnakes contains a single species endemic to Madagascar. It is sister to a species rich clade distributed in Africa, Asia, Australia, Madagascar, and South America (mainly Caribbean). The origin of the Neotropical taxa is considered to be due to dispersal. The basalmost blindsnake clade is Asian (S44).

*Xenotyphlops grandidieri* (Mocquard); Note: *X. mocquardi* considered as synonym

#### **Clade 13: Typhlopidae (15 species)**

Clade description: Malagasy blindsnakes (except *Xenotyphlops*) as far as known belong to a monophyletic group that forms a trichotomy with one Eurasian/Australian clade and one African/Neotropical clade (S44). We here assume the origin of Malagasy *Typhlops* to be ambiguous, African or Asian.

*Typhlops arenarius* (Grandidier); *Typhlops boettgeri* Boulenger; *Typhlops decorsei* Mocquard; *Typhlops domerguei* Roux-Estève; *Typhlops madagascariensis* Boettger; *Typhlops microcephalus* Werner; *Typhlops mucronatus* Boettger; *Typhlops ocellaris* Parker; *Typhlops rajeryi* Renoult & Raselimanana; *Typhlops reuteri*

Boettger; *Typhlops* sp. 1 (ZCMV 5540); *Typhlops* sp. 2 (ZCMV 1913); *Typhlops* sp. 3 (FGZC 1724); *Typhlops* sp. 3 (ZSM 871/2010); *Typhlops* sp. 4 (MRSN-FAZC 11125).

#### **Clade 14: Boidae (4 species)**

Clade description: Malagasy giant snakes are a species-poor group of disputed relationships. They were long considered to be related to the Neotropical boas, but recent molecular analyses (S34, S63) have shown they are a clade sister to the genus *Calabaria* from Africa. We therefore here reconstruct their origin as African rather than South American.

*Acrantophis dumerili* Jan; *Acrantophis madagascariensis* (Duméril & Bibron); *Sanzinia madagascariensis* (Duméril & Bibron); *Sanzinia volontany* Vences & Glaw; Note: *S. volontany* here provisionally ranked as full species.

#### **Clade 15: Lamprophiidae: Pseudoxyrhophiinae (80 species)**

Clade description: Malagasy snakes in the subfamily Pseudoxyrhophiinae were long included in the family Colubridae which has recently been partitioned, and are now seen by some authors as part of the Lamprophiidae. Malagasy pseudoxyrhophiines form a species-rich clade containing all but one of Madagascar's advanced (caenophidian) snakes. This clade is sister to the Socotran genus *Dityopphis* (S45), and several other African snake genera are probably related to pseudoxyrhophiines as well, such as slug-eaters (*Duberria*) and *Amplorhinus* (S64).

*Alluaudina bellyi* Mocquard; *Alluaudina mocquardi* Angel; *Brygophis coulangesi* (Domergue); *Compsophis albiventris* Mocquard; *Compsophis boulengeri* (Peracca); *Compsophis fatsibe* (Mercurio & Andreone); *Compsophis infralineatus* (Günther); *Compsophis laphystius* (Cadle); *Compsophis vinckei* (Domergue); *Compsophis zeny* (Cadle); *Dromicodryas bernieri* (Duméril & Bibron); *Dromicodryas quadrilineatus* (Duméril & Bibron); *Exallodontophis albignaci* (Domergue); *Heteroliodon fohy* Glaw, Vences & Nussbaum; *Heteroliodon lava* Nussbaum & Raxworthy; *Heteroliodon occipitalis* (Boulenger); *Ithycyphus blanci* Domergue; *Ithycyphus goudoti* (Schlegel); *Ithycyphus miniatus* (Schlegel); *Ithycyphus oursi* Domergue; *Ithycyphus perineti* Domergue; *Langaha alluaudi* Mocquard; *Langaha madagascariensis* Bonnaterre; *Langaha pseudoalluaudi* Domergue; *Leioheterodon geayi* Mocquard; *Leioheterodon madagascariensis* Duméril & Bibron; *Leioheterodon modestus* (Günther); *Liophidium apperti* Domergue; *Liophidium chabaudi* Domergue; *Liophidium maintikibo* Franzen, Jones, Raselimanana, Nagy, D'Cruze, Glaw & Vences; *Liophidium pattoni* Vieites, Ratsoavina, Randrianiaina, Nagy, Glaw & Vences; *Liophidium rhodogaster* (Schlegel); *Liophidium therezieni* Domergue; *Liophidium*

*torquatum* (Boulenger); *Liophidium trilineatum* Boulenger; *Liophidium vaillanti* (Mocquard); *Liopholidophis dimorphus* Glaw, Nagy, Franzen & Vences; *Liopholidophis doliocercus* (Peracca); *Liopholidophis grandidieri* Mocquard; *Liopholidophis rhadinaea* Cadle; *Liopholidophis sexlineatus* (Günther); *Liopholidophis varius* (Fischer); *Lycodryas carleti* (Domergue); *Lycodryas citrinus* (Domergue); *Lycodryas gaimardii* (Schlegel); *Lycodryas granuliceps* (Boettger); *Lycodryas guentheri* (Boulenger); *Lycodryas inopinae* (Domergue); *Lycodryas inornatus* (Boulenger); *Lycodryas pseudogranuliceps* (Domergue); *Madagascarophis colubrinus colubrinus* (Schlegel); *Madagascarophis meridionalis* Domergue; *Madagascarophis ocellatus* Domergue; *Micropisthodon ochraceus* Mocquard; *Pararhadinaea melanogaster melanogaster* (Boettger); *Parastenophis betsileanus* (Günther); *Phisalixella arcifasciata* (Duméril & Bibron); *Phisalixella iarakaensis* (Domergue); *Phisalixella tulearensis* (Domergue); *Phisalixella variabilis* (Boulenger); *Pseudoxyrhopus ambreensis* Mocquard; *Pseudoxyrhopus analabe* Nussbaum, Andreone & Raxworthy; *Pseudoxyrhopus ankafinaensis* Raxworthy & Nussbaum; *Pseudoxyrhopus heterurus* (Jan); *Pseudoxyrhopus imerinae* (Günther); *Pseudoxyrhopus kely* Raxworthy & Nussbaum; *Pseudoxyrhopus microps* Günther; *Pseudoxyrhopus oblectator* Cadle; *Pseudoxyrhopus quinquelineatus* (Günther); *Pseudoxyrhopus sokosoko* Raxworthy & Nussbaum; *Pseudoxyrhopus tritaeniatus* Mocquard; *Thamnosophis epistibes* (Cadle); *Thamnosophis infrasignatus* (Günther); *Thamnosophis lateralis* (Duméril & Bibron); *Thamnosophis martaie* (Glaw, Franzen & Vences); *Thamnosophis mavotenda* Glaw, Nagy, Köhler, Franzen & Vences; *Thamnosophis stumpffi* (Boettger); *Madagascarophis* sp. (from Montagne des Français); *Liopholidophis* sp. 1 (from Andasibe); *Liopholidophis* sp. 2 (from Marojejy)

#### **Clade 16: Lamprophiidae: Psammophiinae (1 species)**

**Clade description:** The genus *Mimophis* is endemic to Madagascar and contains a single species.

*Mimophis* is phylogenetically nested within the mainly African subfamily Psammophiinae (S45, S64).

*Mimophis mahfalensis* (Grandidier)

#### **Clade 17: Opluridae (9 species)**

**Clade description:** The iguanas of Madagascar are currently often considered as own family Opluridae. This clade is composed of two genera which are phylogenetically nested among Neotropical iguanas (S34).

*Chalarodon madagascariensis* Peters; *Oplurus cuvieri* (Gray); *Oplurus cyclurus* (Merrem); *Oplurus fierinensis* Grandidier; *Oplurus grandidieri*

Mocquard; *Oplurus quadrimaculatus* Duméril; *Oplurus saxicola* Grandidier; *Chalarodon* sp. "Esomony" (FGZC 2330); *Oplurus* sp. aff. *saxicola* "Esomony" (FGZC 2551).

#### **Clade 18: Chamaeleonidae (94 species)**

**Clade description:** Chameleons are a complex clade for the assessment of biogeographic relationships due to numerous dispersal events and unclarified relationships among many major clades (S46, S65). Chameleons occur in Madagascar and Africa, with single species on India and the Seychelles which however are not related to each other but represent independent dispersals out of Africa (S46, S65). We here use the initial diversification between chameleons from Madagascar (*Brookesia*) and other chameleons (Africa), to assess their age of origin in Madagascar. An alternative would have been to score their separation from agamas and (based on the distribution of agamas) an ambiguous origin from Africa or Asia.

*Brookesia ambreensis* Raxworthy & Nussbaum; *Brookesia antakarana* Raxworthy & Nussbaum; *Brookesia bekolosy* Raxworthy & Nussbaum; *Brookesia betschi* Brygoo, Blanc & Domergue; *Brookesia bonsi* Ramanantsoa; *Brookesia brygooi* Raxworthy & Nussbaum; *Brookesia decaryi* Angel; *Brookesia dentata* Mocquard; *Brookesia ebenau* (Boettger); *Brookesia exarmata* Schimmenti & Jesu; *Brookesia griveaudi* Brygoo, Blanc & Domergue; *Brookesia karchei* Brygoo, Blanc & Domergue; *Brookesia lambertoni* Brygoo & Domergue; *Brookesia lineata* Raxworthy & Nussbaum; *Brookesia lolontany* Raxworthy & Nussbaum; *Brookesia minima* Boettger; *Brookesia nasus nasus* Boulenger; *Brookesia perarmata* (Angel); *Brookesia peyrierasi* Brygoo, Blanc & Domergue; *Brookesia ramanantsoai* Brygoo & Domergue; *Brookesia stumpffi* Boettger; *Brookesia superciliaris* (Kuhl); *Brookesia therezieni* Brygoo & Domergue; *Brookesia thieli* Brygoo & Domergue; *Brookesia tuberculata* Mocquard; *Brookesia vadoni* Brygoo & Domergue; *Brookesia valerieae* Raxworthy; *Calumma amber* Raxworthy & Nussbaum; *Calumma ambreense* (Ramanantsoa); *Calumma andringitraense* (Brygoo, Blanc & Domergue); *Calumma boettgeri* (Boulenger); *Calumma brevicorne* (Günther); *Calumma capuroni* (Brygoo, Blanc & Domergue); *Calumma crypticum* Raxworthy & Nussbaum; *Calumma cucullatum* (Gray); *Calumma fallax* (Mocquard); *Calumma furcifer* (Vaillant & Grandidier); *Calumma gallus* (Günther); *Calumma gastrotaenia* (Boulenger); *Calumma glawi* Böhme; *Calumma globifer* (Günther); *Calumma guibei* (Hillenius); *Calumma guillaumeti* (Brygoo, Blanc & Domergue); *Calumma hafahafa* Raxworthy & Nussbaum; *Calumma hilleniusi* (Brygoo, Blanc & Domergue); *Calumma jevy* Raxworthy & Nussbaum; *Calumma malthe* (Günther); *Calumma marojezense* (Brygoo, Blanc & Domergue); *Calumma nasutum* (Duméril & Bibron); *Calumma*

*oshaughnessyi* (Günther); *Calumma parsonii parsonii* (Cuvier); *Calumma peltierorum* Raxworthy & Nussbaum; *Calumma peyrierasi* Brygoo & Domergue; *Calumma tarzan* Gehring, Pabijan, Ratsoavina, Köhler, Vences & Glaw; *Calumma tsaratananense* (Brygoo & Domergue); *Calumma tsycorne* Raxworthy & Nussbaum; *Calumma vatosoa* Andreone, Mattioli, Jesu & Randrianirina; *Calumma vencesi* Andreone, Mattioli, Jesu & Randrianirina; *Furcifer angeli* (Brygoo & Domergue); *Furcifer antimena* (Grandidier); *Furcifer balteatus* (Duméril & Bibron); *Furcifer belalandaensis* (Brygoo & Domergue); *Furcifer bifidus* (Brongniart); *Furcifer campani* (Grandidier); *Furcifer labordi* (Grandidier); *Furcifer lateralis* (Gray); *Furcifer minor* (Günther); *Furcifer nicosiai* Jesu, Mattioli & Schimmenti; *Furcifer oustaleti* (Mocquard); *Furcifer pardalis* (Cuvier); *Furcifer petteri* (Brygoo & Domergue); *Furcifer rhinocerotus* (Gray); *Furcifer timoni* Glaw, Köhler & Vences; *Furcifer tuzetae* (Brygoo, Bourgat & Domergue); *Furcifer verrucosus verrucosus* (Cuvier); *Furcifer willsii* (Günther); *Brookesia* sp. 1 "desperata" (Foret d'Ambre; ZSM 2170/2007); *Brookesia* sp. 2 "micra" (Nosy Hara; ZSM 2181/2007); *Brookesia* sp. 3 "confidens" (Ankarana; ZSM 2150/2007); *Brookesia* sp. 4 "tristis" (M. des Francais; ZSM 1704/2004); *Brookesia* sp. 5 "brunoi" (ZCMV 12784); *Calumma* sp. 1 "vohibola" (ZSM 645/2009); *Calumma* sp. 2 aff. *boettgeri* "Ambre" (FGZC 1019); *Calumma* sp. 3 aff. *fallax-gallus* "Ambohitsara" (ZCMV 303); *Calumma* sp. 4 aff. *gallus* "Ambatofotsy" (FGZC 2692); *Calumma* sp. 5 aff. *gallus* "South" (ZCMV 8642); *Calumma* sp. 6 aff. *nasutum* "Andohahela 2" (FGZC 2400); *Calumma* sp. 7 aff. *nasutum* "Anjozorobe-Andohahela" (FGZC 2508); *Calumma* sp. 8 aff. *nasutum* "Vohidrazana-Makira" (FGZC 2692); *Calumma* sp. 9 aff. *nasutum* (Sahafina); *Calumma* sp. 10 aff. *malthe* "North" (DRV 6125); *Calumma* sp. 11 aff. *guibei* "Bemanevika" (DRV 6393); *Calumma* sp. 12 aff. *guibei* (ZCMV 12307); *Calumma* sp. 13 aff. *vencesi* "Makira" (ZCMV 11275).

#### **Clade 19: Gerrhosauridae (19 species)**

**Clade description:** The plated lizards are a family exclusively occurring in Africa and Madagascar. Although no comprehensive molecular phylogeny of the family has been published, the available data clearly support the monophyly of Malagasy gerrhosaurids (S66, S67). *Tracheloptychus madagascariensis* Peters; *Tracheloptychus petersi* Grandidier; *Zonosaurus aeneus* (Grandidier); *Zonosaurus anelanelany* Raselimanana, Raxworthy & Nussbaum; *Zonosaurus bemaraha* Raselimanana, Raxworthy & Nussbaum; *Zonosaurus boettgeri* Steindachner; *Zonosaurus brygooi* Lang & Böhme; *Zonosaurus haraldmeieri* Brygoo & Böhme; *Zonosaurus karsteni* (Grandidier); *Zonosaurus laticaudatus*

(Grandidier); *Zonosaurus madagascariensis* (Gray); *Zonosaurus maramaintso* Raselimanana, Nussbaum & Raxworthy; *Zonosaurus maximus* Boulenger; *Zonosaurus ornatus* (Gray); *Zonosaurus quadrilineatus* (Grandidier); *Zonosaurus rufipes* (Boettger); *Zonosaurus subunicolor* (Boettger); *Zonosaurus trilineatus* Angel; *Zonosaurus tsingy* Raselimanana, Raxworthy & Nussbaum

#### **Clade 20: Scincidae: Trachylepis (13 species)**

**Clade description:** The genus *Trachylepis* includes "lygosomine" scincid lizards from Africa and Madagascar that previously had been included in a near-cosmopolitan genus *Mabuya*. Although early studies failed to resolve Malagasy *Trachylepis* as monophyletic, in recent molecular phylogenies the Malagasy taxa (except the possibly introduced *T. comorensis*) form a clade that is phylogenetically nested among African *Trachylepis* (S68). *Trachylepis aureopunctata* (Grandidier); *Trachylepis boettgeri* (Boulenger); *Trachylepis dumasi* (Nussbaum & Raxworthy); *Trachylepis elegans* (Peters); *Trachylepis gravenhorstii* (Duméril & Bibron); *Trachylepis lavarambo* (Nussbaum & Raxworthy); *Trachylepis madagascariensis* (Mocquard); *Trachylepis nancycoutuae* (Nussbaum & Raxworthy); *Trachylepis tandrefana* (Nussbaum, Raxworthy & Ramanamanjato); *Trachylepis tavaratra* (Ramanamanjato, Nussbaum & Raxworthy); *Trachylepis vato* (Nussbaum & Raxworthy); *Trachylepis vezo* Ramanamanjato, Nussbaum & Raxworthy; *Trachylepis volamenaloha* (Nussbaum, Raxworthy & Ramanamanjato)

#### **Clade 21: Scincidae: Scincinae (67 species)**

**Clade description:** The scincid lizards from Madagascar are a morphologically diverse and species-rich group that forms a clade which clearly is related to other African scincines (S69). *Amphiglossus alluaudi* (Brygoo); *Amphiglossus andranovahensis* (Angel); *Amphiglossus anosyensis* Raxworthy & Nussbaum; *Amphiglossus ardouini* (Mocquard); *Amphiglossus astrolabi* Duméril & Bibron; *Amphiglossus crenni* (Mocquard); *Amphiglossus decaryi* (Angel); *Amphiglossus elongatus* (Angel); *Amphiglossus frontoparietalis* (Boulenger); *Amphiglossus gastrostictus* (O'Shaughnessy); *Amphiglossus macrocercus* (Günther); *Amphiglossus mandady* Andreone & Greer; *Amphiglossus mandokava* Raxworthy & Nussbaum; *Amphiglossus melanurus* (Günther); *Amphiglossus meva* Miralles et al.; *Amphiglossus ornaticeps* (Boulenger); *Amphiglossus poecilopus* (Barbour & Loveridge); *Amphiglossus praeornatus* (Angel); *Amphiglossus punctatus* Raxworthy & Nussbaum; *Amphiglossus reticulatus* (Kaudern); *Amphiglossus spilostichus* Andreone & Greer; *Amphiglossus splendidus* (Grandidier); *Amphiglossus stylus* Andreone & Greer; *Amphiglossus tanysona* Andreone & Greer; *Amphiglossus tsaratananensis* (Brygoo); *Androngo*

*trivittatus trivittatus* (Boulenger); *Cryptoblepharus boutonii cognatus* (Boettger); *Madascincus ankodabensis* (Angel); *Madascincus arenicola* Miralles et al.; *Madascincus igneocaudatus* (Grandidier); *Madascincus intermedius* (Boettger); *Madascincus macrolepis* (Boulenger); *Madascincus melanopleura* (Günther); *Madascincus minutus* (Raxworthy & Nussbaum); *Madascincus mouroundavae* (Grandidier); *Madascincus nanus* (Andreone & Greer); *Madascincus polleni* (Grandidier); *Madascincus stumpffi* (Boettger); *Paracontias brocchii* Mocquard; *Paracontias fasika* Köhler, Vences, Erbacher & Glaw; *Paracontias hafa* Andreone & Greer; *Paracontias hildebrandti* (Peters); *Paracontias holomelas* (Günther); *Paracontias kankana* Köhler, Vieites, Glaw, Kaffenberger & Vences; *Paracontias manify* Andreone & Greer; *Paracontias milloti* Angel; *Paracontias minimus* (Mocquard); *Paracontias rothschildi* Mocquard; *Paracontias tsararano* Andreone & Greer; *Paracontias vermisauro* Miralles et al.; *Pseudoacontias angelorum* Nussbaum & Raxworthy; *Pseudoacontias madagascariensis* Bocage; *Pseudoacontias menamainty* Andreone & Greer; *Pseudoacontias unicolor* Sakata & Hikida; *Pygomeles braconnieri* Grandidier; *Pygomeles petteri* Pasteur & Paulian; *Sirenosincus yamagishii* Sakata & Hikida; *Voeltzkowia (Grandidierina) fierinensis* (Grandidier); *Voeltzkowia (Grandidierina) petiti* (Angel); *Voeltzkowia (Voeltzkowia) lineata* (Mocquard); *Voeltzkowia (Voeltzkowia) mira* Boettger; *Voeltzkowia (Voeltzkowia) rubrocaudata* (Grandidier); *Amphiglossus* sp. 1 "robustus" (S80); *Madascincus* sp. 2 "baeus" (S80); *Madascincus* sp. 1 "vitreus" (S80); *Voeltzkowia* sp. 1 "pallida" (S80); *Madascincus* sp. 3. aff. *intermedius* (FGZC 474).

#### **Clade 22: Gekkonidae: *Phelsuma* (34 species)**

Clade description: Day geckos of the genus *Phelsuma* are a clade that diversified in Madagascar, and from here multiple colonizations of other islands of the Indian Ocean took place. Available phylogenetic information is ambiguous regarding the sister group of *Phelsuma*, but it forms a monophyletic group together with *Lygodactylus* and *Rhoptropella*, a monotypic genus from Africa (S70, S71). We therefore assume African origins for *Phelsuma* and use the *Lygodactylus-Phelsuma* split as a proxy for the timing of the separation among these three genera. If *Rhoptropella* is indeed the sister group of *Phelsuma* as suggested by a recent analysis (S71), then the actual origin of *Phelsuma* probably is slightly younger than reconstructed by us which however should not have any relevant influence on our conclusions. *Phelsuma abboti chekei* Börner & Minuth; *Phelsuma antanosy* Raxworthy & Nussbaum; *Phelsuma barbouri* Loveridge; *Phelsuma berghofi* Krüger; *Phelsuma borai* Glaw, Köhler & Vences; *Phelsuma breviceps* Boettger; *Phelsuma dorsivittata* Mertens; *Phelsuma dubia* (Boettger);

*Phelsuma flavigularis* Mertens; *Phelsuma gouldi* Crottini, Gehring, Glaw, Harris, Lima & Vences; *Phelsuma grandis* Gray; *Phelsuma guttata* Kaudern; *Phelsuma hielscheri* Rösler, Obst & Seipp; *Phelsuma hoeschi* Berghof & Trautmann; *Phelsuma kely* Schönecker, Bach & Glaw; *Phelsuma klemmeri* Seipp; *Phelsuma kochi* Mertens; *Phelsuma laticauda laticauda* (Boettger); *Phelsuma lineata lineata* Gray; *Phelsuma madagascariensis* Gray; *Phelsuma malamakibo* Nussbaum, Raxworthy, Raselimanana & Ramanamanjato; *Phelsuma masohoala* Raxworthy & Nussbaum; *Phelsuma modesta modesta* Mertens; *Phelsuma mutabilis* (Grandidier); *Phelsuma parva* Meier; *Phelsuma pronki* Seipp; *Phelsuma pusilla pusilla* Mertens; *Phelsuma quadriocellata quadriocellata* (Peters); *Phelsuma ravenala* Raxworthy, Ingram, Rabibisoa & Pearson; *Phelsuma roesleri* Glaw, Gehring, Köhler, Franzen & Vences; *Phelsuma seippi* Meier; *Phelsuma serraticauda* Mertens; *Phelsuma standingi* Methuen & Hewitt; *Phelsuma vanheygeni* Lerner.

#### **Clade 23: Gekkonidae: *Lygodactylus* (24 species)**

Clade description: The dwarf geckos of Madagascar are a paraphyletic group, with African and South American taxa nested within the Malagasy clade (S72). Similar to *Phelsuma*, we assume the current phylogenetic trichotomy of *Phelsuma*, *Lygodactylus*, and the African *Rhoptropella* to be indicative of an African origin of these geckos, and use the separation of *Phelsuma* and *Lygodactylus* as a proxy for the colonization of Madagascar. This scenario assumes diversification of *Lygodactylus* in Madagascar, and colonization of Africa from there. An alternative scenario is an origin of *Lygodactylus* and *Phelsuma* from a common ancestor in Madagascar, but without more reliable phylogenetic data, this scenario appears to be too speculative. *Lygodactylus arnoulthi* Pasteur; *Lygodactylus bivittis* (Peters); *Lygodactylus blancae* Pasteur; *Lygodactylus blanci* Pasteur; *Lygodactylus decaryi* Angel; *Lygodactylus expectatus* Pasteur & Blanc; *Lygodactylus guibei* Pasteur; *Lygodactylus heterurus heterurus* Boettger; *Lygodactylus intermedius* Pasteur; *Lygodactylus klemmeri* Pasteur; *Lygodactylus madagascariensis madagascariensis* (Boettger); *Lygodactylus miops* Günther; *Lygodactylus mirabilis* (Pasteur); *Lygodactylus montanus* Pasteur; *Lygodactylus ornatus* Pasteur; *Lygodactylus pauliani* Pasteur & Blanc; *Lygodactylus pictus* (Peters); *Lygodactylus rarus* Pasteur & Blanc; *Lygodactylus roavolana* Puente, Glaw, Vieites & Vences; *Lygodactylus tolampyae* (Grandidier); *Lygodactylus tuberosus* Mertens; *Lygodactylus verticillatus* Mocquard; *Lygodactylus* sp. 1 aff. *pictus* (ZMA 19595); *Lygodactylus* sp. 2 aff. *madagascariensis* (ZSM 783/2001)

#### **Clade 24: Gekkonidae: *Blaesodactylus* (4 species)**

Clade description: Malagasy species of velvet geckos form a clade that corresponds to the endemic genus *Blaesodactylus*. Their sister group is the African genus *Homopholis* (S73).

*Blaesodactylus antongilensis* Böhme & Meier; *Blaesodactylus boivini* (Duméril); *Blaesodactylus sakalava* (Grandidier); *Blaesodactylus ambonihazo* Bauer et al.

**Clade 25: Gekkonidae: *Paroedura* (19 species)**

Clade description: *Paroedura* geckos are a clade endemic to Madagascar and the Comoros (S71, S74). Sister to *Paroedura* is probably the endemic Malagasy genus *Ebenavia* with 2 species which however is here not included due to remaining phylogenetic uncertainties. The *Paroedura* clade is nested among African geckos (S71)

*Paroedura androyensis* (Grandidier); *Paroedura bastardi* (Mocquard); *Paroedura gracilis* (Boulenger); *Paroedura homalorhina* (Angel); *Paroedura ibityensis* Rösler & Krüger; *Paroedura karstophila* Nussbaum & Raxworthy; *Paroedura lohatsara* Glaw, Vences & Schmidt; *Paroedura maingoka* Nussbaum & Raxworthy; *Paroedura masobe* Nussbaum & Raxworthy; *Paroedura oviceps* (Boettger); *Paroedura picta* (Peters); *Paroedura stumpffi* (Boettger); *Paroedura tanjaka* Nussbaum & Raxworthy; *Paroedura vahiny* Nussbaum & Raxworthy; *Paroedura vazimba* Nussbaum & Raxworthy; *Paroedura* sp. 1 aff. *homalorhina* (ZSM 1530/2008); *Paroedura* sp. 2 Nosy Hara (ZSM 2189/2007); *Paroedura* sp. 3 Ankarafantsika (ZSM 484/2001); *Paroedura* sp. 4 aff. *tanjaka* Bemaraha (ZSM 128/2006).

**Clade 26: Gekkonidae: *Uroplatus* (19 species)**

Clade description: Leaf tail geckos, genus *Uroplatus*, form a clade endemic to Madagascar (S75). They are phylogenetically nested among other African geckos (S71).

*Uroplatus alluaudi* Mocquard; *Uroplatus ebenau* Boettger; *Uroplatus fimbriatus* (Schneider); *Uroplatus finiavana* Ratsoavina, Louis, Crottini, Randrianiaina, Glaw & Vences; *Uroplatus giganteus* Glaw, Kosuch, Henkel, Sound & Böhme; *Uroplatus guentheri* Mocquard; *Uroplatus henkeli* Böhme & Ibsch; *Uroplatus lineatus* (Duméril & Bibron); *Uroplatus malahelo* Nussbaum & Raxworthy; *Uroplatus malama* Nussbaum & Raxworthy; *Uroplatus phantasticus* Boulenger; *Uroplatus pietschmanni* Böhle & Schönecker; *Uroplatus sameiti* Böhme & Ibsch; *Uroplatus sikorae* Boettger; *Uroplatus* sp. 1 aff. *ebenau* (ZCMV 12280); *Uroplatus* sp. 2 aff. *ebenau* Tsaratanana (ZCMV 12388); *Uroplatus* sp. 3 aff. *ebenau* Tsaratanana (DRV 6280); *Uroplatus* sp. 4 aff. *henkeli* Bemaraha (ZSM 113/2006); *Uroplatus* sp. 5 aff. *sikorae* (ZSM 264/2004).

**Clade 27: Gekkonidae: *Hemidactylus* (1 species)**

Clade description: Of the three species of *Hemidactylus* occurring in Madagascar, one is

genetically diverse (S76) and its mitochondrial haplotypes segregate biogeographically in a pattern agreeing with other reptiles (S77), which indicates its native status on the island. The Malagasy populations are related to conspecific populations from the African mainland.

*Hemidactylus mercatorius* Gray

**Clade 28: Strepsirhini (Lemurs) (96 species)**

Clade description: Lemurs are a well-known and species-rich component of Madagascar's fauna.

Molecular data clearly support monophyly of all Malagasy lemurs (e.g., S2, S78) and their sister-group relationship with a clade composed of lorises and galagos. Although galagos occur in Africa only, lorises are also found in Asia, and we therefore here give the origin of the lemur colonization of Madagascar as ambiguous African or Asian.

*Microcebus murinus*; *Microcebus griseorufus*; *Microcebus berthae*; *Microcebus myoxinus*; *Microcebus ravelobensis*; *Microcebus bongolavensis*; *Microcebus danfossi*; *Microcebus margotmarshae*; *Microcebus sambiranensis*; *Microcebus mampiratra*; *Microcebus tavaratra*; *Microcebus arnholdi*; *Microcebus rufus*; *Microcebus jollyae*; *Microcebus lehilahytsara*; *Microcebus simmonsii*; *Microcebus macarthurii*; *Microcebus mittermeieri*; *Mirza coquereli*; *Mirza zaza*; *Allocebus trichotis*; *Cheirogaleus medius*; *Cheirogaleus sibreei*; *Cheirogaleus major*; *Cheirogaleus crossleyi*; *Cheirogaleus minusculus*; *Phaner furcifer*; *Phaner pallescens*; *Phaner parienti*; *Phaner electromontis*; *Lepilemur mustelinus*; *Lepilemur betsileo*; *Lepilemur microdon*; *Lepilemur jamesorum*; *Lepilemur wrightae*; *Lepilemur fleuretae*; *Lepilemur hollandorum*; *Lepilemur seali*; *Lepilemur scottorum*; *Lepilemur milanoii*; *Lepilemur ankaranesis*; *Lepilemur septentrionalis*; *Lepilemur dorsalis*; *Lepilemur tymerlachsonorum*; *Lepilemur mittermeieri*; *Lepilemur sahamalazensis*; *Lepilemur grewcockorum*; *Lepilemur otto*; *Lepilemur edwardsi*; *Lepilemur aeeclis*; *Lepilemur ahmansonorum*; *Lepilemur randrianasoloi*; *Lepilemur ruficaudatus*; *Lepilemur hubbardorum*; *Lepilemur petteri*; *Lepilemur leucopus*; *Hapalemur griseus*; *Hapalemur meridionalis*; *Hapalemur occidentalis*; *Hapalemur alaotrensis*; *Hapalemur aureus*; *Prolemur simus*; *Lemur catta*; *Eulemur fulvus*; *Eulemur rufus*; *Eulemur rufifrons*; *Eulemur albifrons*; *Eulemur sanfordi*; *Eulemur cinereiceps*; *Eulemur collaris*; *Eulemur macaco*; *Eulemur flavifrons*; *Eulemur coronatus*; *Eulemur rubriventer*; *Varecia variegata*; *Varecia rubra*; *Avahi laniger*; *Avahi mooreorum*; *Avahi peyrierasi*; *Avahi betsileo*; *Avahi ramanantsoavanai*; *Avahi meridionalis*; *Avahi occidentalis*; *Avahi cleesei*; *Avahi unicolor*; *Propithecus verreauxi*; *Propithecus deckenii*; *Propithecus coronatus*; *Propithecus coquereli*; *Propithecus tattersalli*; *Propithecus diadema*; *Propithecus edwardsi*; *Propithecus*

*candidus*; *Propithecus perrieri*; *Indri indri*;  
*Daubentonia madagascariensis*

**Clade 29: Tenrecidae (29 species)**

Clade description: Monophyly of all current genera of Malagasy tenrecs relative to all other extant afrotherian groups is well supported by molecular data (S47, S2). Their sister group are the exclusively African potamogalines (otter shrews). *Geogale aurita*; *Limnogale mergulus*; *Microgale brevicaudata*; *Microgale cowani*; *Microgale dobsoni*; *Microgale drouhardi*; *Microgale dryas*; *Microgale fotsifotsy*; *Microgale gracilis*; *Microgale gymnorhyncha*; *Microgale longicaudata*; *Microgale monticola*; *Microgale nasoloi*; *Microgale parvula*; *Microgale principula*; *Microgale pusilla*; *Microgale soricoides*; *Microgale taiva*; *Microgale talazaci*; *Microgale thomasi*; *Microgale jobihely*; *Microgale jenkinsae*; *Oryzorictes hova*; *Oryzorictes tetradactylus*; *Echinops telfairii*; *Hemicentetes semispinosus*; *Hemicentetes nigriceps*; *Setifer setosus*; *Tenrec ecaudatus*

**Clade 30: Muridae: Nesomyinae (24 species)**

Clade description: Recent molecular data are unambiguous in supporting the monophyly of Malagasy rodents (S2), which are included all in the subfamily Nesomyinae. Those genera not yet included in multi-locus phylogenetic assessments are known to be closely related to other genera from Madagascar (S79). Although murid relationships cannot yet be considered to be fully clarified, the available data are unambiguous in suggesting that an African clade of taxa is sister to nesomyines (S2).

*Brachytarsomys albicauda*; *Brachytarsomys villosa*; *Brachytarsomys ramirohitra*;  
*Brachytarsomys betsiloensis*; *Eliurus ellermani*;  
*Eliurus grandidieri*; *Eliurus majori*; *Eliurus minor*;  
*Eliurus myoxinus*; *Eliurus penicillatus*; *Eliurus petteri*; *Eliurus tanala*; *Eliurus webbi*;  
*Gymnuromys roberti*; *Hypogeomys antimena*;  
*Macrotarsomys bastardi*; *Macrotarsomys ingens*;  
*Monticolomys/Macrotarsomys koopmani*;  
*Monticolomys/Macrotarsomys petteri*; *Nesomys audeberti*; *Nesomys lambertoni*; *Nesomys rufus*;  
*Voalavo gymnocaudatus*; *Voalavo antsahabensis*

**Clade 31: Eupleridae (9 species)**

Clade description: Although they have historically been classified in different families, molecular data clearly suggest that all Malagasy carnivores form a monophyletic group (currently considered as endemic family Eupleridae) and that the predominantly African herpestids are their sister group (S2, S78).

*Galidia elegans*; *Galidictes fasciata*; *Galidictis grandidieri*; *Mungotictis decemlineata*; *Salanoia concolor*; *Salanoia durrelli*; *Cryptoprocta ferox*;  
*Eupleres goudotii*; *Fossa fossana*
